# 1 **The genomic variation landscape of globally-circulating clades of** 2 **SARS-CoV-2 defines a genetic barcoding scheme**

3 Qingtian Guan<sup>1</sup>, Mukhtar Sadykov<sup>1</sup>, Raushan Nugmanova<sup>1</sup>, Michael J. Carr<sup>2,3</sup>, Stefan T.  
4 Arold<sup>4,5</sup>, Arnab Pain<sup>1,3,6\*</sup>

5

6 <sup>1</sup>King Abdullah University of Science and Technology (KAUST), Pathogen Genomics  
7 Laboratory, Biological and Environmental Science and Engineering (BESE), Thuwal-  
8 Jeddah, 23955-6900, Saudi Arabia;

9 <sup>2</sup>National Virus Reference Laboratory (NVRL), School of Medicine, University College  
10 Dublin, Belfield, Dublin 4, Ireland;

11 <sup>3</sup>Research Center for Zoonosis Control, Global Institution for Collaborative Research and  
12 Education (GI-CoRE); Hokkaido University, N20 W10 Kita-ku, Sapporo, 001-0020 Japan;

13 <sup>4</sup>King Abdullah University of Science and Technology (KAUST), Computational  
14 Bioscience Research Center (CBRC), Biological and Environmental Science and  
15 Engineering (BESE), Thuwal-Jeddah, 23955-6900, Saudi Arabia;

16 <sup>5</sup>Centre de Biochimie Structurale, CNRS, INSERM, Université de Montpellier, 34090  
17 Montpellier, France;

18 <sup>6</sup>Nuffield Division of Clinical Laboratory Sciences (NDCLS), The John Radcliffe Hospital,  
19 University of Oxford, Headington, Oxford, OX3 9DU, United Kingdom.

20

21 **\*Correspondence:** Arnab Pain Email: [arnab.pain@kaust.edu.sa](mailto:arnab.pain@kaust.edu.sa). King Abdullah  
22 University of Science and Technology, Jeddah, Saudi Arabia. Phone: (+966) 54 470 0687

23

## 24 **ABSTRACT**

25 We describe fifteen major mutation events from 2,058 high-quality SARS-CoV-2  
26 genomes deposited up to March 31<sup>st</sup>, 2020. These events define five major clades (G, I, S,  
27 D and V) of globally-circulating viral populations, representing 85.7% of all sequenced  
28 cases, which we can identify using a 10 nucleotide genetic classifier or barcode. We applied  
29 this barcode to 4,000 additional genomes deposited between March 31<sup>st</sup> and April 15<sup>th</sup> and  
30 classified successfully 95.6% of the clades demonstrating the utility of this approach. An  
31 analysis of amino acid variation in SARS-CoV-2 ORFs provided evidence of substitution  
32 events in the viral proteins involved in both host-entry and genome replication. The  
33 systematic monitoring of dynamic changes in the SARS-CoV-2 genomes of circulating  
34 virus populations over time can guide therapeutic and prophylactic strategies to manage  
35 and contain the virus and, also, with available efficacious antivirals and vaccines, aid in the  
36 monitoring of circulating genetic diversity as we proceed towards elimination of the agent.  
37 The barcode will add the necessary genetic resolution to facilitate tracking and monitoring  
38 of infection clusters to distinguish imported and indigenous cases and thereby aid public  
39 health measures seeking to interrupt transmission chains without the requirement for real-  
40 time complete genomes sequencing.

41

## 42 **INTRODUCTION**

43 SARS-CoV-2 has now reached 185 countries across all continents, except Antarctica.  
44 With over 2.5 million cases currently confirmed globally<sup>1</sup>, a pandemic was declared by the  
45 World Health Organisation (WHO) on March 11<sup>th</sup>, 2020. SARS-CoV-2 belongs to the

46 Coronaviridae family, genus Betacoronavirus, which are enveloped positive-sense, single-  
47 stranded RNA viruses, of zoonotic origin. Among human RNA viruses, coronaviruses have  
48 the largest known genome (~30 kb), which consists of the structural proteins (spike,  
49 envelope, membrane and nucleocapsid), nonstructural proteins (nsp1-16), and accessory  
50 proteins (ORF3a, ORF6, ORF7a and b, ORF8, ORF10). Structural proteins are required  
51 for host cell entry, viral assembly and exit<sup>2,3</sup>. Nonstructural proteins are involved in genome  
52 replication-transcription and formation of vesicles<sup>4</sup>, whereas accessory proteins interfere  
53 with host innate defense mechanisms<sup>5,6,7</sup>. During replication within the host, the virus  
54 acquires genome mutations, which can be passed on to virus progeny in subsequently  
55 infected individuals. Systematically tracking mutations in SARS-CoV-2 genomes is  
56 therefore important as it allows monitoring of the molecular epidemiology of circulating  
57 viral sequences nationally and internationally. Here, we have investigated the genomic  
58 variation landscape of a large set of globally-derived SARS-CoV-2 genomes and defined  
59 major mutation events. This analysis allowed us to produce a first-generation genetic  
60 classifier, or ‘barcode’, defining the major clades of the virus circulating up to April 15<sup>th</sup>,  
61 2020. Notably, this barcode allowed reliable tracking of the spatial distribution and  
62 prevalence of these viral clades over time. While most of the nonsynonymous mutation  
63 events appear neutral with respect to protein function and stability, we also found evidence  
64 of mutations in the spike protein that may modulate the interaction between SARS-CoV-2  
65 and the host.

## 66 **RESULTS**

67 **Five clades of SARS-CoV-2 are characterised by 15 major mutational events across**  
68 **the globe.**

69 The SARS-CoV-2 genome is genetically most closely related (96%) to a bat SARS-  
70 related coronavirus (SARSr-CoV) RaTG13 and also to SARSr-CoVs from pangolins<sup>8</sup>  
71 (Supplementary Figure 1). We analysed single nucleotide polymorphisms (SNPs) of 2,058  
72 high-quality complete genomes downloaded from GISAID<sup>9</sup> (March 31<sup>st</sup>). We studied their  
73 chronological occurrences during the spread of the SARS-CoV-2 across human  
74 populations, which allowed us to define several major and minor clades of the virus that  
75 share unique SNPs (Supplementary Table 1, Supplementary Figures 2, 3). We observed  
76 1,221 SNPs in the current dataset with 753 missense, 452 silent, 12 nonsense and 4  
77 intergenic substitutions. We defined five major clades (Figure 1) compared to the prototype  
78 (MN908947.3), covering 85.7% of the global set of SARS-CoV-2 high-quality genomes  
79 publicly available up to March 31<sup>st</sup>. The clades were named by the amino acid mutation: S  
80 (*Orf8*, L84S), V (*Orf3a*, G251V), I (*Orf1ab*, V378I), D (*Orf1ab*, G392D) and G (*S*,  
81 D614G).

82 These 5 clades are characterised by 15 major nucleotide substitution events in the  
83 SARS-CoV-2 genome (Figure 1, Figure 2 and Supplementary Figure 3) representing 1,763  
84 genomes (85.7%) from 45 countries. To obtain a global picture of the regional distribution  
85 of the clades over time during a 14 week period, we plotted the relative proportions of the  
86 major and minor clades and their cumulative trend (Figure 3). We observed major  
87 differences in the apparent spread for individual clades: Clade G represents 46.2% of all  
88 the sequenced viral sequences, followed by S (25.4%), V (9.4%), I (2.6%) and D (2.1%).  
89 The remaining 14.3% were not assigned to a major clade. Clade G is widely distributed in  
90 Africa, Europe, West Asia and South America; whereas Clade S represents 63% of North

91 American sampled genomes, and nearly a quarter of those from Oceania. Clade I represents  
92 around one-third of genomes derived from South and West Asia, and Oceania. Southeast  
93 Asia and South Asia have the greatest number of unassigned genomes (56.9%). For these  
94 genomes that cannot be assigned to a major clade, we identified nine minor clades which  
95 were named for the amino acid mutation or nucleotide substitution (the latter shown in  
96 bold): H (*Orflab*, Q676H); H2 (*M*, D209H); L2 (*N*, S194L, we name it L2 to avoid  
97 confusion with the previously defined clade<sup>8</sup>); S2 (*N*, P344S); G11410A (*Orflab*,  
98 **G11410A**); Y (*S*, H49Y); C17373A (*Orflab*, **C17373A**); I2 (*Orflab*, T6136I) and K  
99 (*Orflab*, T2016K). The minor clades represent any monoclades with  $n \geq 5$  which covers  
100 3.2% of the total 2,058 cases. The global and regional cumulative trends were plotted over  
101 time, with the majority of the trends revealing the increasing dominance of one or two  
102 clades in each geographic region. For example, the Asian and Oceanian genomes are  
103 largely clade I whereas European genomes are predominantly clade G with clade S  
104 predominating in North America cases. This is likely attributable to founder effects during  
105 the early phases of the seeding of the local epidemics from imported cases and subsequent  
106 dissemination in the regions.

107

108 **The genetic barcoding method assigns new SARS-CoV-2 cases to clades with high**  
109 **sensitivity.**

110 We defined a 10 nucleotide genetic barcode of SARS-CoV-2 that identified with high  
111 sensitivity the five major clades of the circulating viral genomes available on March 31<sup>st</sup>,

112 based on the GISAID data (Figure 4A, Table 1). Given that SARS-CoV-2 evolves at an  
113 average rate/genome of nearly  $8 \times 10^{-4}$  nucleotide substitutions/site/year<sup>10</sup>, and is subject  
114 to back-mutations, we further tested the sensitivity and specificity of these clade-defining  
115 SNPs, which are all above 90% (Table 1). We then applied the 10 nucleotide barcode to  
116 the 4,000 SARS-CoV-2 genomes that became available in GISAID between March 31<sup>st</sup>  
117 and April 15<sup>th</sup>, 2020 in the early stages of the pandemic. Among the 4,000 globally-  
118 circulating genomes from 66 countries, we could assign ~96% to one of the 5 major clades  
119 (Figure 4B). The remaining unassigned 4% of genomes were typified by either errors in  
120 their sequences (such as 'N's in the genome assemblies), or single cases those could not be  
121 reliably assigned to any of the major clades. The increase in the correct clade assignment  
122 for the new genomes compared to the initial validation of the methodology on 2,058  
123 genomes (from which the barcode was established) was indicative of the rising dominance  
124 of a few major clades, and suggested that the 10 nucleotide barcode will retain its predictive  
125 power as new genomes are obtained. While this barcode represents a snapshot of the early  
126 phases of the genetic diversity of the virus during the first 16 weeks of its global spread  
127 and is expected to change over time, a barcoding strategy to monitor the progress of virus  
128 elimination after vaccines become widely available will be strategically useful to monitor  
129 decreases in viral genetic diversity. In addition, our barcode could serve as a reference for  
130 setting the baseline for global genomic diversity analysis at the beginning of the pandemic.

131

### 132 **Mutations are not equally distributed across the SARS-CoV-2 genome.**

133 Based on our analysis of the 2,058 available genomes from GISAID (March 31<sup>th</sup>, 2020)  
134 we observed that the genes *S*, *N* and *Orf3a*, accumulated markedly more mutations than

135 expected solely by random drift (Supplementary Figure 4) (Real/Expected ratio: *S*: 1.21;  
136 *N*: 1.99; *ORF3a*: 1.82). This mutation rate may indicate adaptation to the human host  
137 following recent spill over from an, as yet unknown, animal reservoir. Conversely, several  
138 nonstructural proteins showed a lower-than-expected mutation rate (Real/Expected ratio:  
139 *nsp1*: 0.22; *nsp3*: 0.77; *nsp5*: 0.70; *nsp7*: 0.77; *nsp12*: 0.88; *nsp14*: 0.68; *nsp15*: 0.76).  
140 These proteins are predicted to be involved in evading host immune defenses, in enhancing  
141 viral expression and in cleavage of the replicase polyprotein, based on prior studies of  
142 related betacoronaviruses<sup>11,12</sup>. Hence, this lower mutation rate may indicate purification  
143 selection to maintain these functions essential for efficient immune evasion and subsequent  
144 viral dissemination. Indeed, structural proteins in coronaviruses undergo a greater degree  
145 of antigenic variation which increases the fitness of the virus by means of adaptation to the  
146 host and by facilitating immune escape<sup>13</sup>.

147

148 Structural protein modeling confirmed that most of the nonsynonymous mutations in  
149 the nonstructural proteins were neutral (Supplementary Figure 5-13). Conversely, several  
150 nonsynonymous mutations in the spike protein might have functional consequences:  
151 notably, the G clade-defining mutation D614G is located in subdomain 1 (SD1; Figure 5,  
152 Supplementary Figure 5). In the trimeric S, D612 engages stabilising interactions within  
153 SD1 (R646 or the backbone of F592, depending on the chain) and with the S1 of the  
154 adjacent chain (T859 and K854). Replacement of D614 with a glycine would entail losing  
155 these stabilising electrostatic interactions and increase the dynamics in this region. Notably,  
156 V483A (found in 13 cases in Washington state, USA), V367F (in 6 cases: 5 in Paris, France;  
157 1 in Hong Kong) and G476S (in 7 cases: 4 in Washington state, USA; 1 in Idaho state,

158 USA; 1 in Oregon state, USA; and 1 in Braine-l'Alleud, Belgium) are localised in the  
159 receptor binding domain (RBD) of the spike protein which mediates binding to the host  
160 receptor angiotensin-converting enzyme 2 (ACE2) (Figure 5)<sup>3</sup>. All of the viral genomes  
161 harbouring V483A and G476S mutations belong to Clade S. Interestingly, the V367F  
162 mutation has appeared independently in Clade V and Clade S, suggesting that this mutation  
163 contributes to viral fitness. We found the V483A substitution in 13 closely-related cases  
164 from Washington State. An equivalent amino acid substitution located in a similar position  
165 within the RBD in the MERS-CoV spike protein reduces its binding to its cognate receptor  
166 DPP4/CD26<sup>14</sup> (Supplementary Table 2). However, V483 is more than 10Å away from  
167 ACE2 and could affect receptor binding by SARS-CoV-2 only indirectly by altering the  
168 structural dynamics of the RBD loop it is a part of. The V367F mutation is located in an  
169 even greater distance from ACE2 (Figure 5, Supplementary Figure 5D). The exchange of  
170 the small hydrophobic residue valine with a bulky hydrophobic phenylalanine might  
171 influence the efficiency of glycosylation of the nearby N343, or the positioning of the  
172 sugars. The substitution G476S would lead to possible clashes with predicted interacting  
173 ACE2 residues and with the RBD residue N487. However, minor reorientation of the side  
174 chains might allow an additional hydrogen bond to be formed between S476 and ACE2  
175 Q24 and E23, thus enhancing the affinity (Supplementary Figure 5D) to ACE2. An  
176 equivalent amino acid substitution located in an analogous position within the RBD in the  
177 SARS-CoV spike protein was associated with neutralisation escape from monoclonal  
178 antibodies, together with other mutations observed previously<sup>15</sup> (Supplementary Table 2).  
179 Given that V483A and V367F are solvent exposed and markedly alter the surface  
180 characteristics of the RBD, they might also facilitate antibody evasion. Escape mutations



181 in the RBD of the SARS-CoV S protein (T332I, F460C and L443R) were identified  
182 previously<sup>15</sup>. These mutations negatively impact viral fitness through reducing the affinity  
183 to the host receptor<sup>16</sup> (Supplementary Table 2). The nonsynonymous mutations in the N  
184 protein, which have key roles in viral assembly, might also have functional implications.  
185 The hotspot mutations S202N, R203K and G204R all cluster in a linker region where they  
186 might potentially enhance RNA binding and alter the response to serine phosphorylation  
187 events (Supplementary Figure 6). The clade I-defining mutation in the nucleocapsid  
188 protein, which has key roles in viral assembly, is synonymous. However, we observed  
189 nonsynonymous mutations in the nucleocapsid protein that are predicted to have functional  
190 implications. The hotspot mutations S202N, R203K and G204R all cluster in a linker  
191 region where they might potentially enhance RNA binding and alter the response to serine  
192 phosphorylation events (Supplementary Figure 6).

193

## 194 **DISCUSSION**

195 In this study, we have defined 5 major clades (G, I, S, D and V) and 9 minor clades  
196 (H2, L2, G1110A, H, Y, C17373A, S2, I2 and K) which covers ~89% of the 2,058 high  
197 quality genomes available until March 31<sup>st</sup> in GISAID database. The clustering of these  
198 genomes revealed the spread of clades to diverse geographical regions (Figure 1, Figure 3).  
199 This pattern contrasts with those observed for other epidemic coronaviruses, such as  
200 MERS-CoV, which display distinct geographical clustering<sup>17</sup>. For example, clade G, which  
201 was first detected on January 28<sup>th</sup>, has reached 40 countries and 130 cities, within a span  
202 of 10 weeks (Supplementary Table 1). This pattern demonstrates efficient viral  
203 transmission through frequent intercontinental travel during the period when international

204 travel restrictions were only present sporadically, which has enabled the virus to spread to  
205 multiple distant locations within a short period of time. This observation reinforces the  
206 importance of curtailing international travel and imposing restrictions early in pandemics  
207 and imposing social distancing in order to contain the global spread of viruses.

208

209 We have observed a distinct distribution of the major clades in different parts of the  
210 world (Figure 3). Most of the viral genomes that have not been assigned to a major clade  
211 are found in Asia and have earlier detection times in January and February at the start of  
212 the epidemic in China (Supplementary Figure 2). We observed a decrease in the genetic  
213 diversity of the virus over time following dissemination from China, especially in Europe  
214 and North America that each notably now has a predominant clade type, which we believe  
215 to be associated with a founder effect whereby a single clade was introduced and  
216 subsequently disseminated (Figure 3). An important caveat of the present study is that the  
217 current sampling of available public genomes does likely not represent the extant genetic  
218 diversity of virus populations in circulation due to biases of genome data deposits from the  
219 sequencing laboratories based mainly in the northern hemisphere and new datasets may  
220 define new clades in the near future from regions, including Africa, the Indian subcontinent  
221 and Latin America with comparably few genomes available at present. In this case,  
222 additional identifiers within an evolving barcode scheme can be added to track and monitor  
223 future emerging clades with higher resolution. On the other hand, the genetic stability of  
224 SARS-CoV-2<sup>18</sup> may result in the continuing circulation of a limited number of clades until  
225 such time as mitigation measures including the isolation of vulnerable populations and the  
226 availability of efficacious antivirals and vaccines reduces the genetic diversity in

227 circulation. This molecular genotyping approach has been demonstrated for other viruses  
228 (e.g. measles, poliovirus, rotavirus and human papillomaviruses) with herd-immunity  
229 vaccination programmes working to eliminate pathogens from endemic circulation in  
230 humans<sup>19,20,21,22</sup>. The availability of a barcoding scheme that rapidly generates a SNP  
231 allowing clade assignment will be critical in this elimination phase when widespread  
232 availability of vaccines permits eradication of SARS-CoV-2 from endemicity in humans.

233

234 Our work provides a baseline global genomic epidemiology of SARS-CoV-2 prior to  
235 introduction of therapeutic and prophylactic approaches. The mutational landscape of  
236 global populations of over SARS-CoV-2 6,000 genomes provides an evidence-based  
237 framework for tracking the clades that comprise the pandemic on different continents.  
238 However, due to the bias in the representation of countries depositing the SARS-CoV-2  
239 genomes with over-representation of North American and European genomes (28.3% and  
240 47.2% respectively) and the available genome data representing only a minute proportion  
241 of the total COVID-19 positive cases from each of these regions (America, 0.27%; Europe,  
242 0.31%; China, 0.31%. Data collected from GISAID<sup>9</sup> and COVID-19 dashboard<sup>1</sup>), the  
243 genetic barcode described here may need to be updated in order to be globally  
244 representative, once sufficient numbers of genomes covering less represented parts of the  
245 world are eventually sequenced and deposited to publicly-available database. We envisage  
246 a qPCR-based allelic discrimination approach, such as PCR allele competitive extension  
247 (PACE), which would enable rapid turnaround in real-time following the identification of  
248 a laboratory-confirmed case. This would allow viral genetic epidemiological data to be  
249 added to contact tracing information to allow efficient detection of circulating SARS-CoV-

250 2 clades that will allow discrimination of autochthonous and imported clades to aid  
251 progressive elimination of the genetic diversity and, ultimately, eradication in all regions.  
252 A robust genetic barcoding scheme for SARS-CoV-2 can facilitate this molecular tracking  
253 of larger numbers of laboratory-confirmed cases and by implementing such a facile  
254 genotyping approach upstream of next-generation sequencing will allow whole genome  
255 sequencing to be performed on selected cases. This is of particular relevance when the  
256 available genomes represent only a small sample of the over 2.5 million total COVID-19  
257 cases globally to date.

258

## 259 **METHODS**

### 260 *Phylogenomic Analysis*

261 1,427 coronavirus genomes were downloaded from Virus Pathogen Database and Analysis  
262 Resource (ViPR)<sup>23</sup> on February 14<sup>th</sup> 2020, including 329 SARS, 35 SARS-CoV-2, 61  
263 NL63, 521 MERS, 52 HKU1, 170 OC43, 97 bovine coronaviruses and 61 mouse hepatitis  
264 viruses. Sequence alignment was performed using MAFFT(version 7.407)<sup>24</sup> software and  
265 then trimmed by trimAL(version 1.4.1)<sup>25</sup>. Phylogenetic analyses of the complete genomes  
266 were done with FastTree(version 2.1.10)<sup>26</sup> software with default parameters, and  
267 iTOL(version 5)<sup>27</sup> was used for phylogenetic tree visualisation.

268

269 2,127 complete SARS-CoV2 genomes were downloaded from the GISAID9 (March 31<sup>th</sup>  
270 2020). 69 of those genomes were removed due to poor assembly quality resulting in 2,058  
271 complete genomes that were subsequently used for analysis. Sequence alignment was  
272 performed with MAFFT(version 7.407)<sup>24</sup> and trimmed by trimAL(version 1.4.1)<sup>25</sup>.

273 Phylogenetic analyses of the complete genomes were performed with RAxML<sup>28</sup> (version  
274 8.2.12) with 1,000 bootstrap replicates, employing the general time-reversible nucleotide  
275 substitution model. iTOL(version 5)<sup>27</sup> was used for the phylogenetic tree visualisation.  
276 SNPs from each of the genomes were called by Parsnp (version 1.2) from the Harvest  
277 suite<sup>29</sup> using MN908947.3 as the reference genome, and the SNPs were further annotated  
278 by SnpEff(version 4.3m)<sup>30</sup>. The monoclades associated with SNPs with a frequency  $\geq 40$   
279 were defined as major clades and monoclades associated with SNPs with a frequency  $\geq 5$   
280 were defined as minor clades.

281

### 282 *Protein Structural Analysis*

283 Experimentally determined protein structures were obtained from the Protein Data Bank  
284 (PDB). SwissModel<sup>31</sup>, I-Tasser<sup>32</sup>, RaptorX<sup>33</sup> and an in-house modelling pipeline was used  
285 to produce protein structure homology models. Phobius<sup>34</sup> was used for prediction of trans-  
286 membrane regions. RaptorX was also used for predicting secondary structure, protein  
287 disorder and solvent exposure of amino acids. Pymol(version 1.8.6.2) was used for  
288 visualization.

289

## 290 **ACKNOWLEDGEMENTS**

291 This work was supported by funding from King Abdullah University of Science and  
292 Technology (KAUST), Office of Sponsored Research (OSR), under award number  
293 FCC/1/1976-25-01. Work in AP's laboratory is supported by the KAUST faculty baseline  
294 fund (BAS/1/1020-01- 01) and research grants from the Office for Sponsored Research  
295 (OSR-2015-CRG4-2610, OCRF-2014-CRG3-2267). We thank all laboratories which have

296 contributed sequences to the GISAID database. We thank Olga Douvropoulou, Raecece  
297 Naeem Mohamed Ghazzali and Sharif Hala for their support during the work. We also  
298 thank Richard Culleton (Nagasaki University, Japan) and Gabo Gonzalez (UCD, Ireland)  
299 for their critical comments on the manuscript draft.

300

## 301 **AUTHOR CONTRIBUTIONS**

302 AP conceived the study and supervised the work; AP and QG designed the analysis. QG,  
303 MS and SA performed the data analysis and prepared the initial draft of the manuscript,  
304 followed by edits from AP, MC and RN. All authors have commented on various sections  
305 of the manuscript.

306

## 307 **COMPETING INTERESTS**

308 The authors have no conflicts of interest to declare.

## 309 **REFERENCES:**

- 310 1. Dong, E., Du, H. & Gardner, L. An interactive web-based dashboard to track  
311 COVID-19 in real time. *Lancet. Infect. Dis.* **3099**, 19–20 (2020).
- 312 2. Bárcena, M. *et al.* Cryo-electron tomography of mouse hepatitis virus: Insights  
313 into the structure of the coronavirus. *Proc. Natl. Acad. Sci. U. S. A.* (2009).  
314 doi:10.1073/pnas.0805270106

- 315 3. Hoffmann, M. *et al.* SARS-CoV-2 Cell Entry Depends on ACE2 and TMPRSS2  
316 and Is Blocked by a Clinically Proven Protease Inhibitor Article SARS-CoV-2  
317 Cell Entry Depends on ACE2 and TMPRSS2 and Is Blocked by a Clinically  
318 Proven Protease Inhibitor. *Cell* **181**, 1–10 (2020).
- 319 4. Hagemeijer, M. C. *et al.* Membrane rearrangements mediated by coronavirus  
320 nonstructural proteins 3 and 4. *Virology* (2014). doi:10.1016/j.virol.2014.04.027
- 321 5. Wu, A. *et al.* Genome Composition and Divergence of the Novel Coronavirus  
322 (2019-nCoV) Originating in China. *Cell Host Microbe* (2020).  
323 doi:10.1016/j.chom.2020.02.001
- 324 6. Wu, F. *et al.* A new coronavirus associated with human respiratory disease in  
325 China. *Nature* (2020). doi:10.1038/s41586-020-2008-3
- 326 7. Liu, D. X., Fung, T. S., Chong, K. K. L., Shukla, A. & Hilgenfeld, R. Accessory  
327 proteins of SARS-CoV and other coronaviruses. *Antiviral Research* (2014).  
328 doi:10.1016/j.antiviral.2014.06.013

- 329 8. Tang, X. *et al.* On the origin and continuing evolution of SARS-CoV-2. *Natl. Sci.*  
330 *Rev.* **6**, (2020).
- 331 9. Shu, Y. & McCauley, J. GISAID: Global initiative on sharing all influenza data –  
332 from vision to reality. *Eurosurveillance* (2017). doi:10.2807/1560-  
333 7917.ES.2017.22.13.30494
- 334 10. Hadfield, J. *et al.* NextStrain: Real-time tracking of pathogen evolution.  
335 *Bioinformatics* (2018). doi:10.1093/bioinformatics/bty407
- 336 11. Báez-Santos, Y. M., St. John, S. E. & Mesecar, A. D. The SARS-coronavirus  
337 papain-like protease: Structure, function and inhibition by designed antiviral  
338 compounds. *Antiviral Research* (2015). doi:10.1016/j.antiviral.2014.12.015
- 339 12. Posthuma, C. C., te Velhuis, A. J. W. & Snijder, E. J. Nidovirus RNA  
340 polymerases: Complex enzymes handling exceptional RNA genomes. *Virus*  
341 *Research* (2017). doi:10.1016/j.virusres.2017.01.023
- 342 13. Walls, A. C. *et al.* Structure, Function, and Antigenicity of the SARS-CoV-2 Spike  
343 Glycoprotein. *Cell* (2020). doi:10.1016/j.cell.2020.02.058



- 344 14. Kleine-Weber, H. *et al.* Mutations in the Spike Protein of Middle East Respiratory  
345 Syndrome Coronavirus Transmitted in Korea Increase Resistance to Antibody-  
346 Mediated Neutralization. *J. Virol.* (2018). doi:10.1128/jvi.01381-18
- 347 15. Rockx, B. *et al.* Escape from Human Monoclonal Antibody Neutralization Affects  
348 In Vitro and In Vivo Fitness of Severe Acute Respiratory Syndrome Coronavirus.  
349 *J. Infect. Dis.* (2010). doi:10.1086/651022
- 350 16. Tang, X. C. *et al.* Identification of human neutralizing antibodies against MERS-  
351 CoV and their role in virus adaptive evolution. *Proc. Natl. Acad. Sci. U. S. A.*  
352 (2014). doi:10.1073/pnas.1402074111
- 353 17. Kim, J. Il *et al.* The recent ancestry of Middle East respiratory syndrome  
354 coronavirus in Korea has been shaped by recombination. *Sci. Rep.* (2016).  
355 doi:10.1038/srep18825
- 356 18. Jia, Y. *et al.* Analysis of the mutation dynamics of SARS-CoV-2 reveals the spread  
357 history and emergence of RBD mutant with lower ACE2 binding affinity. *bioRxiv*  
358 (2020).

- 359 19. Brown, K. E. *et al.* Genetic characterization of measles and rubella viruses  
360 detected through global measles and rubella elimination surveillance, 2016-2018.  
361 *Morb. Mortal. Wkly. Rep.* (2019). doi:10.15585/mmwr.mm6826a3
- 362 20. Mankertz, A. *et al.* Spread of measles virus D4-Hamburg, Europe, 2008-2011.  
363 *Emerg. Infect. Dis.* (2011). doi:10.3201/eid1708.101994
- 364 21. Grassly, N. C. The final stages of the global eradication of poliomyelitis.  
365 *Philosophical Transactions of the Royal Society B: Biological Sciences* (2013).  
366 doi:10.1098/rstb.2012.0140
- 367 22. Soares-Weiser, K. *et al.* Vaccines for preventing rotavirus diarrhoea: vaccines in  
368 use. in *Cochrane Database of Systematic Reviews* (2012).  
369 doi:10.1002/14651858.cd008521.pub3
- 370 23. Pickett, B. E. *et al.* ViPR: An open bioinformatics database and analysis resource  
371 for virology research. *Nucleic Acids Res.* (2012). doi:10.1093/nar/gkr859

- 372 24. Katoh, K. & Standley, D. M. MAFFT multiple sequence alignment software  
373 version 7: Improvements in performance and usability. *Mol. Biol. Evol.* (2013).  
374 doi:10.1093/molbev/mst010
- 375 25. Capella-Gutiérrez, S., Silla-Martínez, J. M. & Gabaldón, T. trimAl: A tool for  
376 automated alignment trimming in large-scale phylogenetic analyses.  
377 *Bioinformatics* **25**, 1972–1973 (2009).
- 378 26. Price, M. N., Dehal, P. S. & Arkin, A. P. Fasttree: Computing large minimum  
379 evolution trees with profiles instead of a distance matrix. *Mol. Biol. Evol.* (2009).  
380 doi:10.1093/molbev/msp077
- 381 27. Letunic, I. & Bork, P. Interactive Tree Of Life (iTOL): An online tool for  
382 phylogenetic tree display and annotation. *Bioinformatics* (2007).  
383 doi:10.1093/bioinformatics/btl529
- 384 28. Stamatakis, A. RAxML version 8: A tool for phylogenetic analysis and post-  
385 analysis of large phylogenies. *Bioinformatics* **30**, 1312–1313 (2014).

- 386 29. Treangen, T. J., Ondov, B. D., Koren, S. & Phillippy, A. M. The harvest suite for  
387 rapid core-genome alignment and visualization of thousands of intraspecific  
388 microbial genomes. *Genome Biol.* **15**, (2014).
- 389 30. Cingolani, P. *et al.* A program for annotating and predicting the effects of single  
390 nucleotide polymorphisms, SnpEff: SNPs in the genome of *Drosophila*  
391 *melanogaster* strain w1118; iso-2; iso-3. *Fly (Austin)*. (2012).  
392 doi:10.4161/fly.19695
- 393 31. Arnold, K., Bordoli, L., Kopp, J. & Schwede, T. The SWISS-MODEL workspace:  
394 A web-based environment for protein structure homology modelling.  
395 *Bioinformatics* (2006). doi:10.1093/bioinformatics/bti770
- 396 32. Yang, J. *et al.* The I-TASSER suite: Protein structure and function prediction.  
397 *Nature Methods* (2014). doi:10.1038/nmeth.3213
- 398 33. Källberg, M., Margaryan, G., Wang, S., Ma, J. & Xu, J. Raptorx server: A  
399 resource for template-based protein structure modeling. *Methods Mol. Biol.*  
400 (2014). doi:10.1007/978-1-4939-0366-5\_2

- 401 34. Käll, L., Krogh, A. & Sonnhammer, E. L. L. Advantages of combined  
402 transmembrane topology and signal peptide prediction-the Phobius web server.  
403 *Nucleic Acids Res.* **35**, (2007).
- 404 35. Senior, A. W. *et al.* Improved protein structure prediction using potentials from  
405 deep learning. *Nature* (2020). doi:10.1038/s41586-019-1923-7
- 406 36. John Jumper, Tunyasuvunakool, K., Kohli, P. & Hassabis, D. Computational  
407 predictions of protein structures associated with COVID-19. (2020). Available at:  
408 [https://deepmind.com/research/open-source/computational-predictions-of-protein-](https://deepmind.com/research/open-source/computational-predictions-of-protein-structures-associated-with-COVID-19)  
409 [structures-associated-with-COVID-19.](https://deepmind.com/research/open-source/computational-predictions-of-protein-structures-associated-with-COVID-19)
- 410

Tree scale: 0.00001

- Major Clade**
- Clade G
  - Clade S
  - Clade V
  - Clade D
  - Clade I

- Date of sample collection**
- Unknown
  - Dec.24(2019)-Dec.28(2019)
  - Dec.29(2019)-Jan.4(2020)
  - Jan.5-Jan.11
  - Jan.12-Jan.18
  - Jan.19-Jan.25
  - Jan.26-Feb.1
  - Feb.2-Feb.8
  - Feb.9-Feb.15
  - Feb.16-Feb.22
  - Feb.23-Feb.29
  - Mar.2-Mar.7
  - Mar.9-Mar.14
  - Mar.15-Mar.21
  - Mar.22-Mar.28

**Country/Location**

- China
- Hong Kong
- Taiwan
- Japan
- South Korea
- Nepal
- India
- Vietnam
- Cambodia
- Thailand
- Malaysia
- Singapore
- Australia
- New Zealand
- Saudi Arabia
- Kuwait
- Iran
- Pakistan
- Georgia
- Russia
- Slovakia
- Poland
- Hungary
- France
- Iceland
- Norway
- Denmark
- Croatia
- Netherlands
- Belgium
- Luxembourg
- Germany
- Austria
- Switzerland
- Italy
- Spain
- Czech Republic
- United Kingdom
- Ireland
- Finland
- Sweden
- Portugal
- Greece
- Nigeria
- Senegal
- Algeria
- Lithuania
- Congo
- South Africa
- Chile
- Ecuador
- Brazil
- Columbia
- Panama
- Mexico
- United States
- Canada

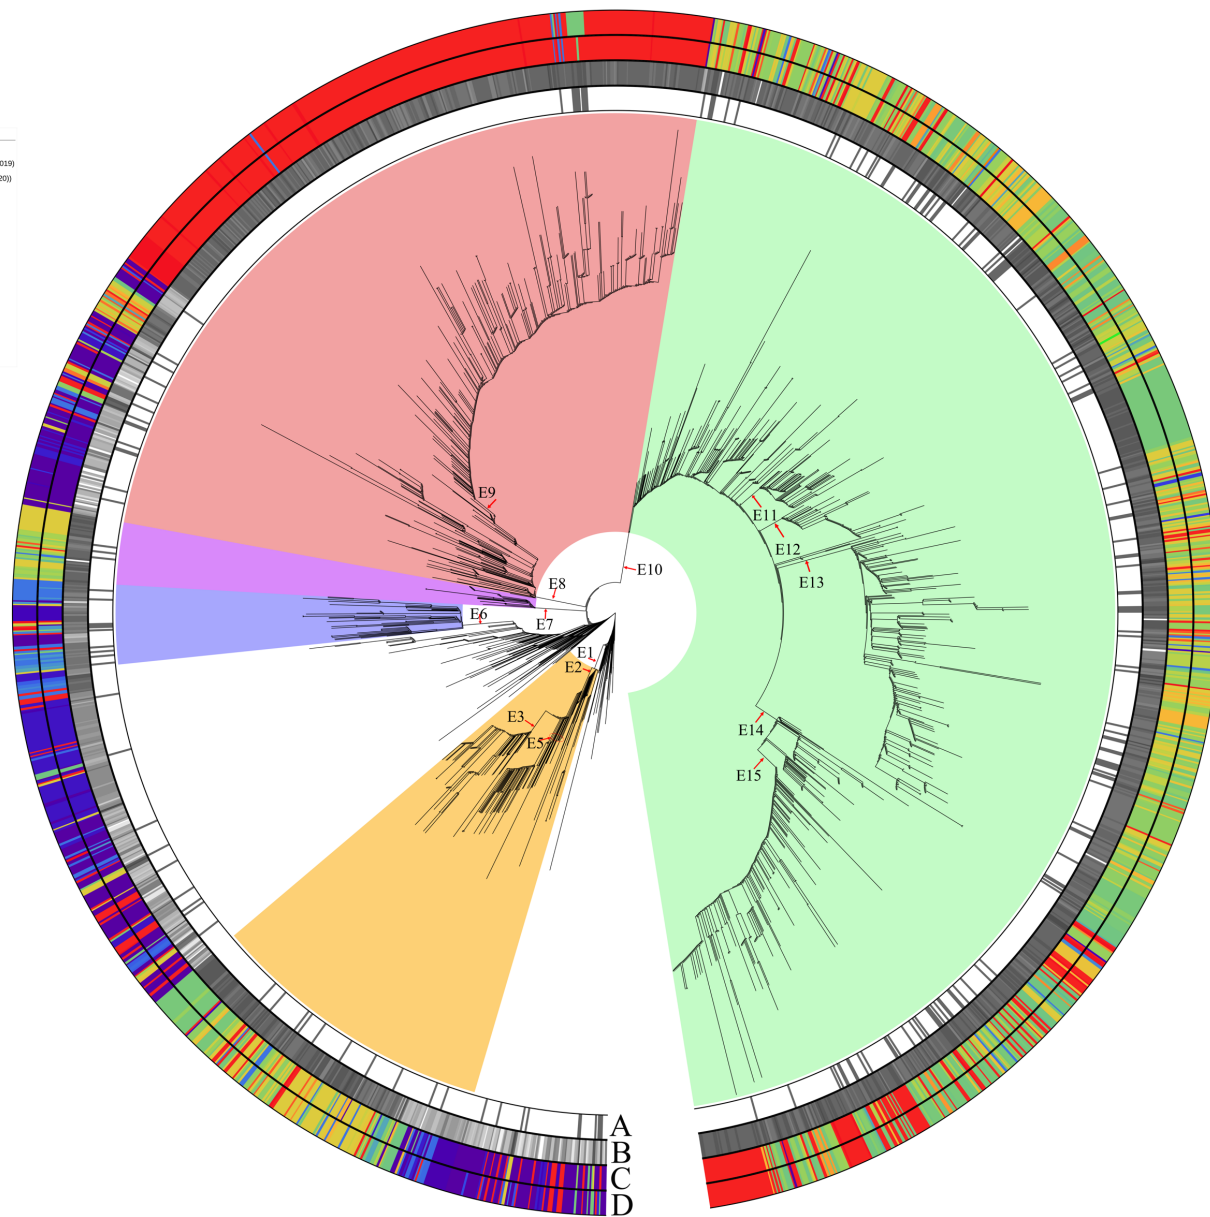

412 **Figure 1. Major substitutions events in SARS-CoV-2.** A global SNP-based radial phylogeny of SARS-CoV-2 genomes defining five  
413 major clades (S, G, V, D and I) and several subclades based on nucleotide substitution events. E1-E15 represents the 15 major  
414 evolutionary events. Branches with >70% bootstrap values are shown and all the main clade-defining branches have bootstrap  
415 values >90%. E4, which corresponds to a G11083A mutation in ORF1a was found in two independent branches of the tree and for  
416 illustration purposes it is shown in Supplementary Figure 2. The labeling for the concentric outer circles I as follows: A, the imported  
417 cases which the country of exposure differs from the country of isolation; B, the collection date of each case with one week resolution;  
418 C, collection locations of the cases; D exposure locations of the cases.

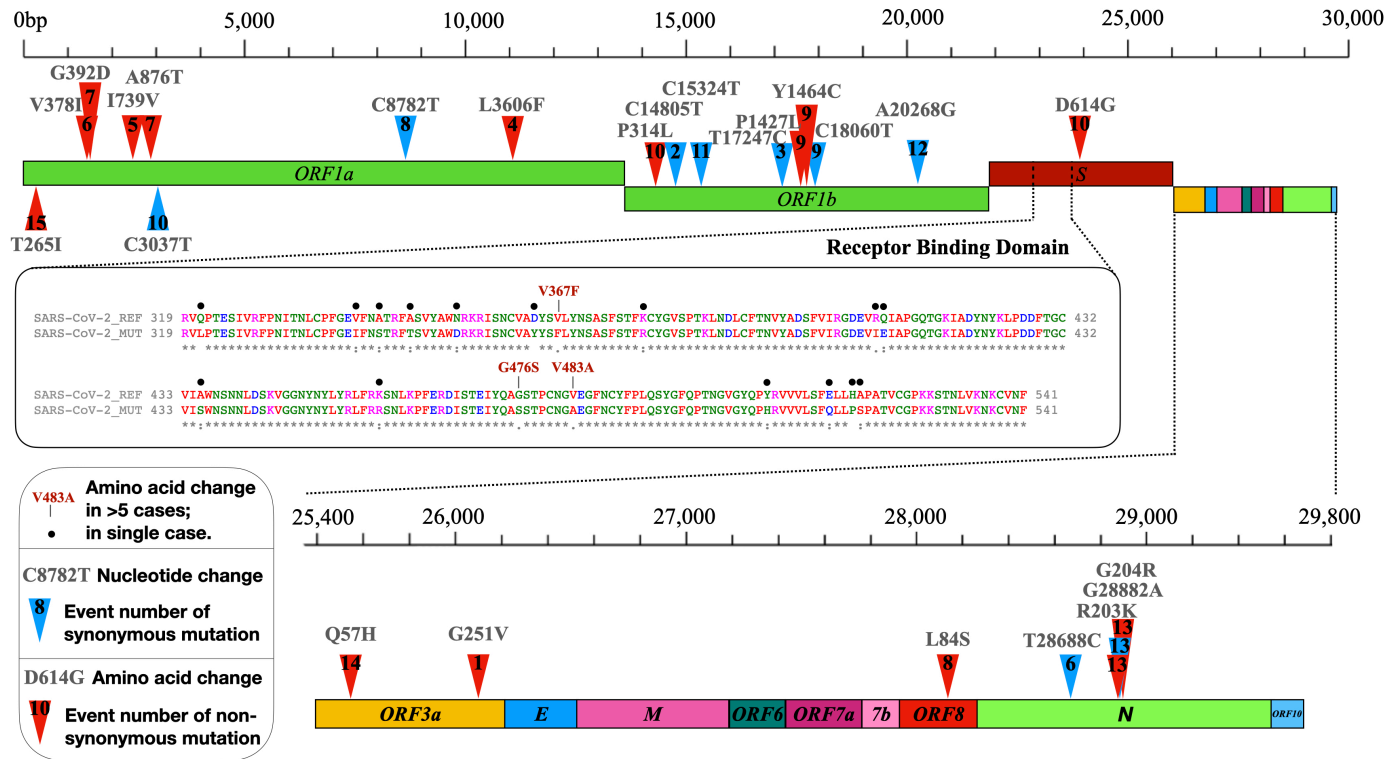

419

420 **Figure 2. Major mutations and associated variation in globally circulating SARS-CoV-2 genomes (n=2,058).** Genomic localisation  
 421 of major mutation events as defined within our study. SARS-CoV-2 mutations in the receptor-binding domain (RBD) sequence contain all  
 422 amino acid substitutions from 2,058 genomes available up until March 31<sup>st</sup> 2020.



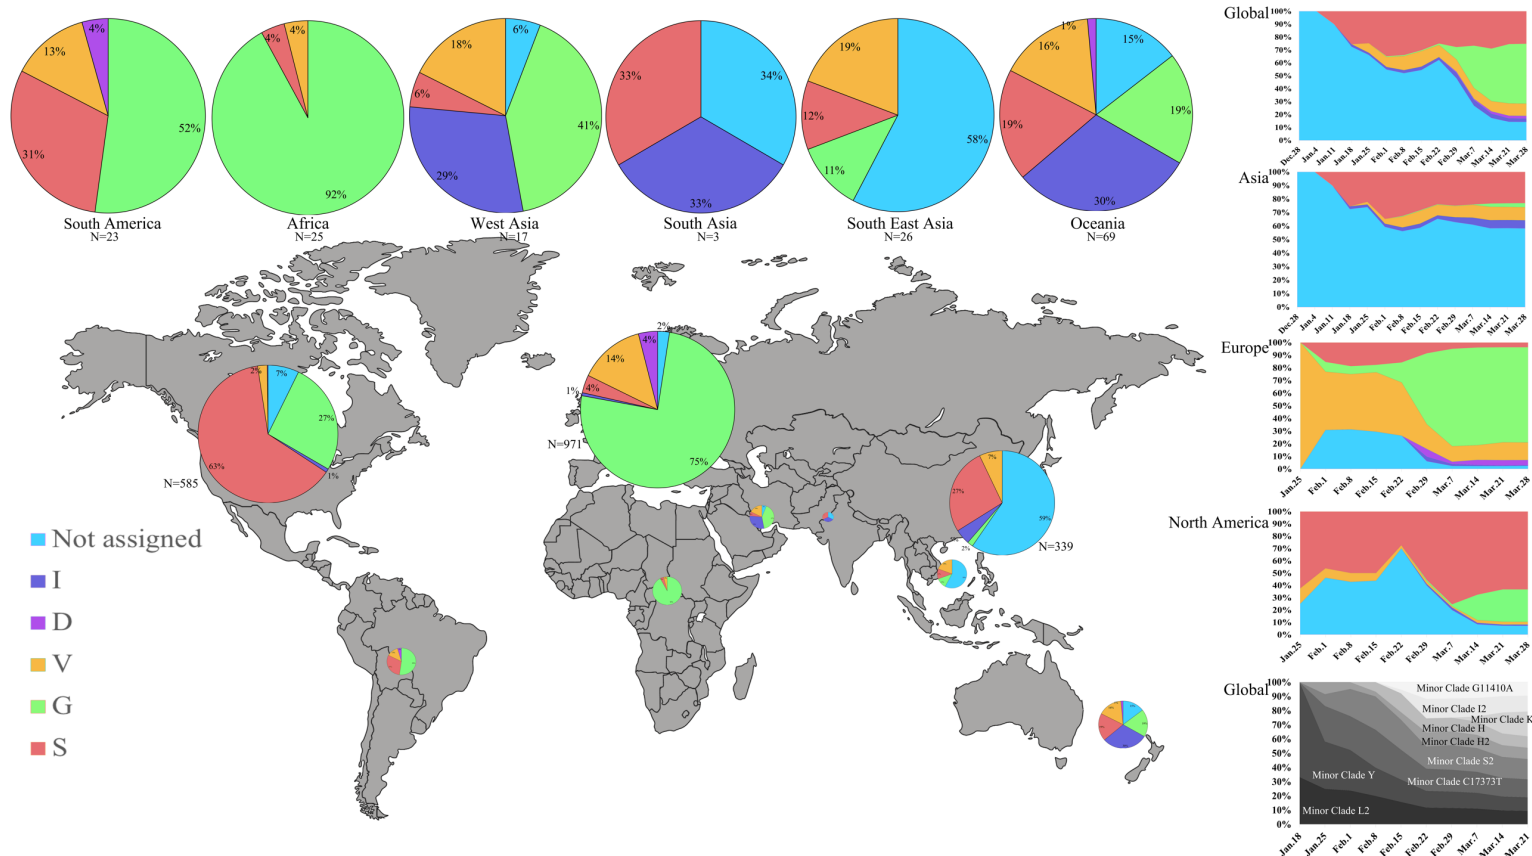

423

424 **Figure 3. Global distribution of various major and minor clades of SARS-CoV2 genomes and their relative prevalence over a**  
 425 **14 week time period from December 24<sup>th</sup> 2019 to March 28<sup>th</sup> 2020 from the outbreak and early stages of the pandemic. The size**  
 426 **of each pie chart is proportional to the numbers within each respective clade (Europe, max=971; South Asia, min=3). The cumulative**

427 trend of the clades is shown on the right and the span of time indicates the first and last observed case in each particular clade, until  
428 March 28<sup>th</sup> 2020.

429

**A**

| Position | 8792(ORF1a) | 28144(ORF8) | 26144(ORF3a) | 30571(ORF1b) | 14408(ORF1d) | 23403(S) | 13971(ORF1e) | 28688(N) | 14401(ORF1a) | 28911(ORF1b) |
|----------|-------------|-------------|--------------|--------------|--------------|----------|--------------|----------|--------------|--------------|
| Clade S  | T           | C           | G            | C            | C            | A        | G            | T        | G            | G            |
| Clade V  | C           | T           | T            | C            | C            | A        | G            | T        | G            | G            |
| Clade G  | C           | T           | G            | T            | T            | G        | G            | T        | G            | G            |
| Clade I  | C           | T           | G            | C            | C            | A        | A            | C        | G            | G            |
| Clade D  | C           | T           | G            | C            | C            | A        | G            | T        | A            | A            |

**B**

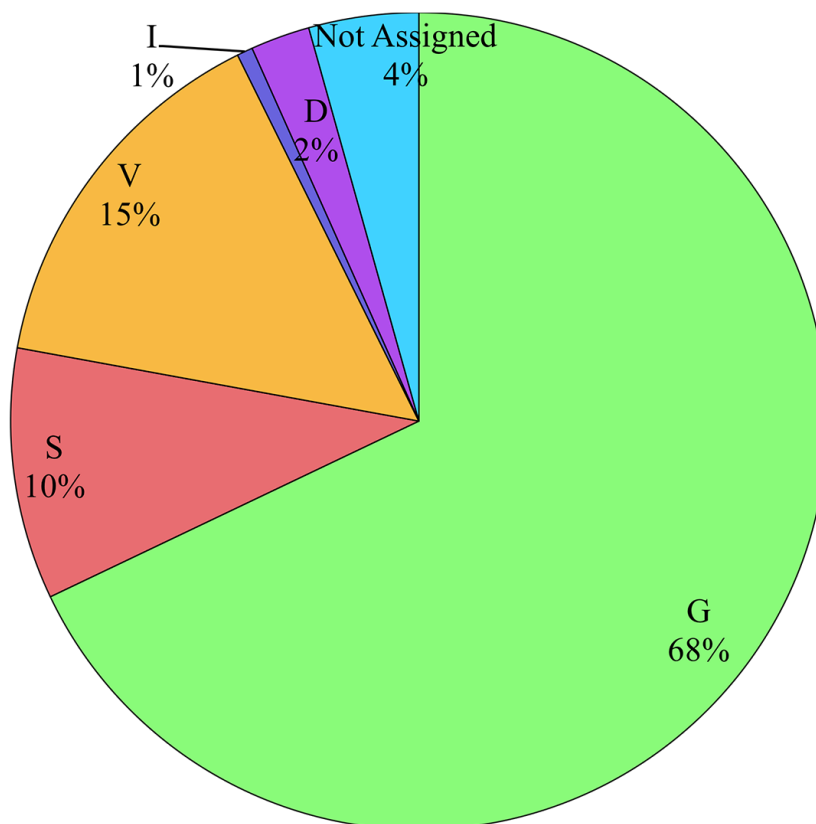

430

431 **Figure 4. Major mutations and associated variation in globally circulating SARS-**  
 432 **CoV-2 genomes (n=6,058) available until April 15<sup>th</sup> 2020. (A) A 10 nucleotide SNP**

433 genetic barcode that defines the 5 clades of SARS-CoV-2. (B) By applying this barcode  
434 we are able to classify 95.6% of the cases published between March 31<sup>st</sup> and April 15<sup>th</sup>  
435 2020 during the early phase of the pandemic. Pie charts showing the percentage of each  
436 major clade by applying a 10 nucleotide genetic classifier to 4,000 new genomes  
437 downloaded from GISAID.

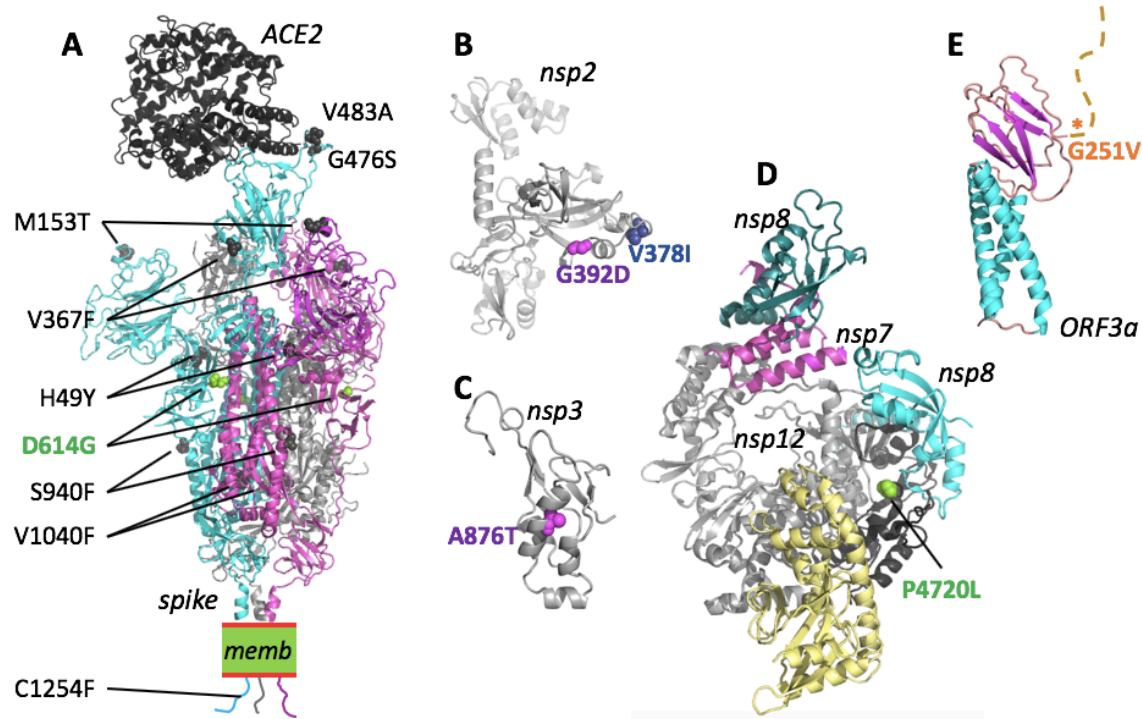

438

439 **Figure 5: Mapping of SARS-CoV-2 clade-defining mutations onto the proteins.**

440 Nonsynonymous mutations for proteins where the 3D structure was experimentally

441 determined (spike, nsp12/7/8) or can be inferred with reasonable confidence. Mutations are

442 colour-coloured as for the corresponding clades in Figure 3 (D: magenta; G: light green; I:

443 blue; V: orange). For a detailed analysis, see Supplementary Figures 5-13. (A) The

444 structure of the SARS-CoV-2 spike trimer in its open conformation (chains are cyan,

445 magenta and grey) bound to the human receptor ACE2 (black) modeled based on PDB

446 accessions 6m17 and 6vyb. Identified nonsynonymous mutations are shown as spheres in

447 the model. For reasons of visibility only mutations of two of the three spike chains are

448 labeled. memb. indicates the plasma membrane. (B) Fragment comprising residues 180-

449 534 of nsp2, modelled by AlphaFold<sup>35</sup>. Both clade-defining mutations are located in

450 solvent-exposed regions and would not lead to steric clashes. (C) The substitution A876T

451 (corresponding to residue A58 in the nsp3 cleavage product numbering) is situated in the

452 N-terminal ubiquitin-like domain of nsp3. The structure of this domain can be inferred  
453 based on the 79% identical structure of residues 1-112 from SARS-CoV (PDB id 2idy).  
454 The substitution A876T can be accommodated with only minor structural adjustments and  
455 is not expected to have a substantial influence on the proteins stability or function. (D) The  
456 structure shows the nsp12 in complex with nsp7 (magenta) and nsp8 (cyan and teal), based  
457 on PDB 7btf. P4720 (P323 in nsp12 numbering) is located in the ‘interface domain’ (black).  
458 In this position, the P323L substitution is not predicted to disrupt the folding or protein  
459 interactions and hence is not expected to have strong effects. (E) A theoretical model for  
460 the Orf3a monomer has been proposed by AlphaFold<sup>36</sup>. The structure-function relationship  
461 of this protein remains to be clarified. The mutation G251V is located C-terminal to the  $\beta$ -  
462 sandwich domain and the tail (marked by an asterisk).

463 **Table 1. Sensitivity and specificity of the SARS-CoV-2 clade-defining SNP based on 2,058 genomes covering the first 14 weeks**  
 464 **of the COVID-19 outbreak.**

465

| Clade Defined | Event | ORF           | Nucleotide Substitution | Amino Acid Substitution | True Positive | False Positive | False Negative | True Negative | Specificity | Sensitivity |
|---------------|-------|---------------|-------------------------|-------------------------|---------------|----------------|----------------|---------------|-------------|-------------|
| V             | E1    | <i>Orf3a</i>  | G26144T                 | Gly251Val               | 195           | 0              | 1              | 1862          | 1.000       | 0.995       |
| I             | E6    | <i>Orflab</i> | G1397A                  | Val378Ile               | 54            | 0              | 0              | 2004          | 1.000       | 1.000       |
|               |       | <i>N</i>      | T28688C                 |                         | 53            | 1              | 2              | 2002          | 1.000       | 0.964       |
| D             | E7    | <i>Orflab</i> | G1440A                  | Gly392Asp               | 42            | 0              | 0              | 2016          | 1.000       | 1.000       |
|               |       | <i>Orflab</i> | G2891A                  | Ala876Thr               | 39            | 0              | 3              | 2016          | 1.000       | 0.929       |
| S             | E8    | <i>Orflab</i> | C8782T                  |                         | 521           | 4              | 2              | 1531          | 0.997       | 0.996       |
|               |       | <i>Orf8</i>   | T28144C                 | Leu84Ser                | 523           | 1              | 0              | 1534          | 0.999       | 1.000       |
| G             | E10   | <i>Orflab</i> | C3037T                  |                         | 946           | 1              | 4              | 1107          | 0.999       | 0.996       |
|               |       | <i>Orflab</i> | C14408T                 | Pro4720Leu              | 948           | 1              | 2              | 1107          | 0.999       | 0.998       |
|               |       | <i>S</i>      | A23403G                 | Asp614Gly               | 946           | 1              | 4              | 1107          | 0.999       | 0.996       |

466

467

468

469 **The genomic variation landscape of globally-circulating clades of SARS-CoV-2 defines a genetic**  
470 **barcoding scheme**

471 **SUPPLEMENTARY FIGURES**

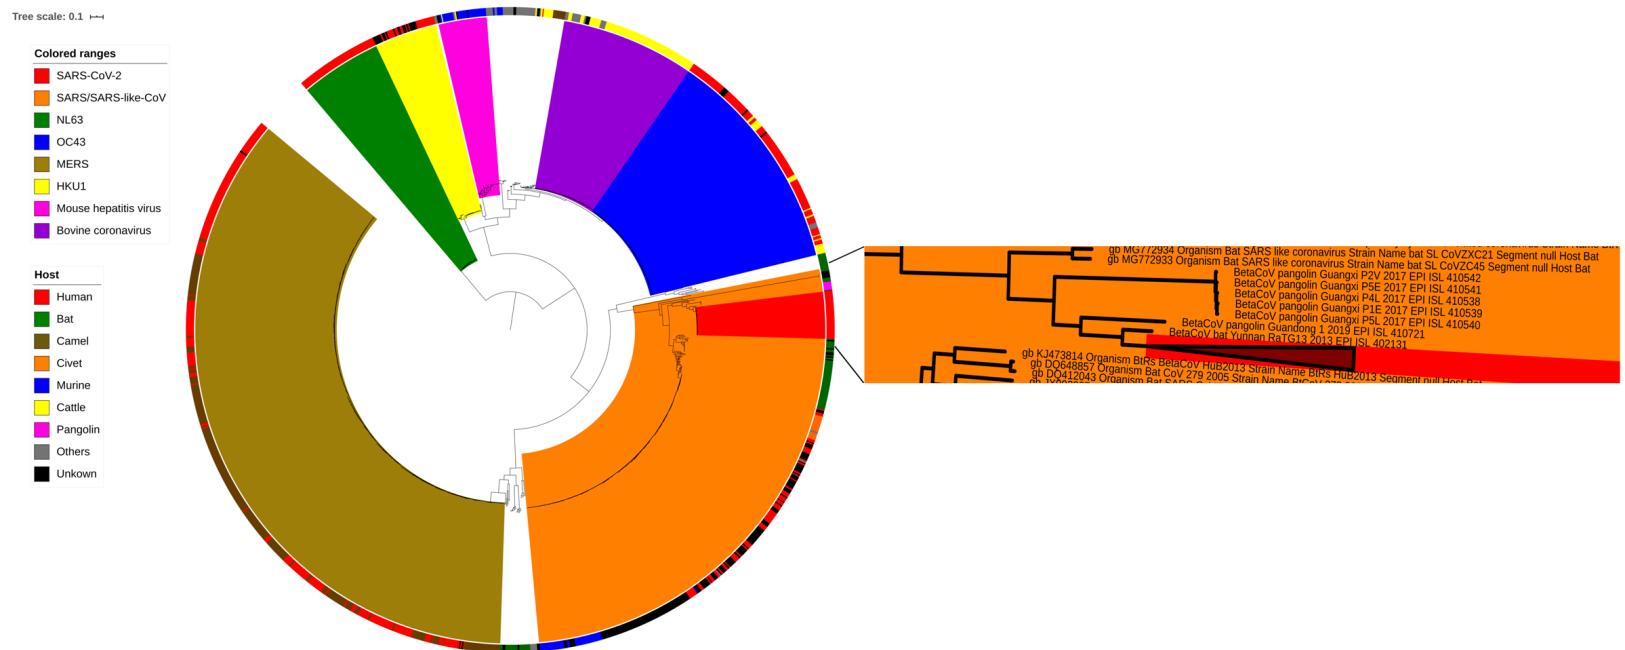

472  
473 **Supplementary Figure 1. A maximum likelihood phylogenomic tree based on whole genomes from SARS-CoV-2 and other**  
474 **coronaviruses.** All available complete genomes of an alphacoronavirus (NL63) and several major groups of betacoronavirus  
475 species were used to construct the phylogenetic tree. The colour-coded outer circle represents the host of each specific genome



476 sequence. The SARS-CoV-2 part of the phylogenetic tree has been expanded for better resolution of the tree with closely related  
477 viral species. A total of 1,427 SARS-CoV-2 whole genomes were illustrated in the phylogeny.

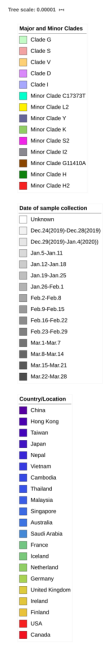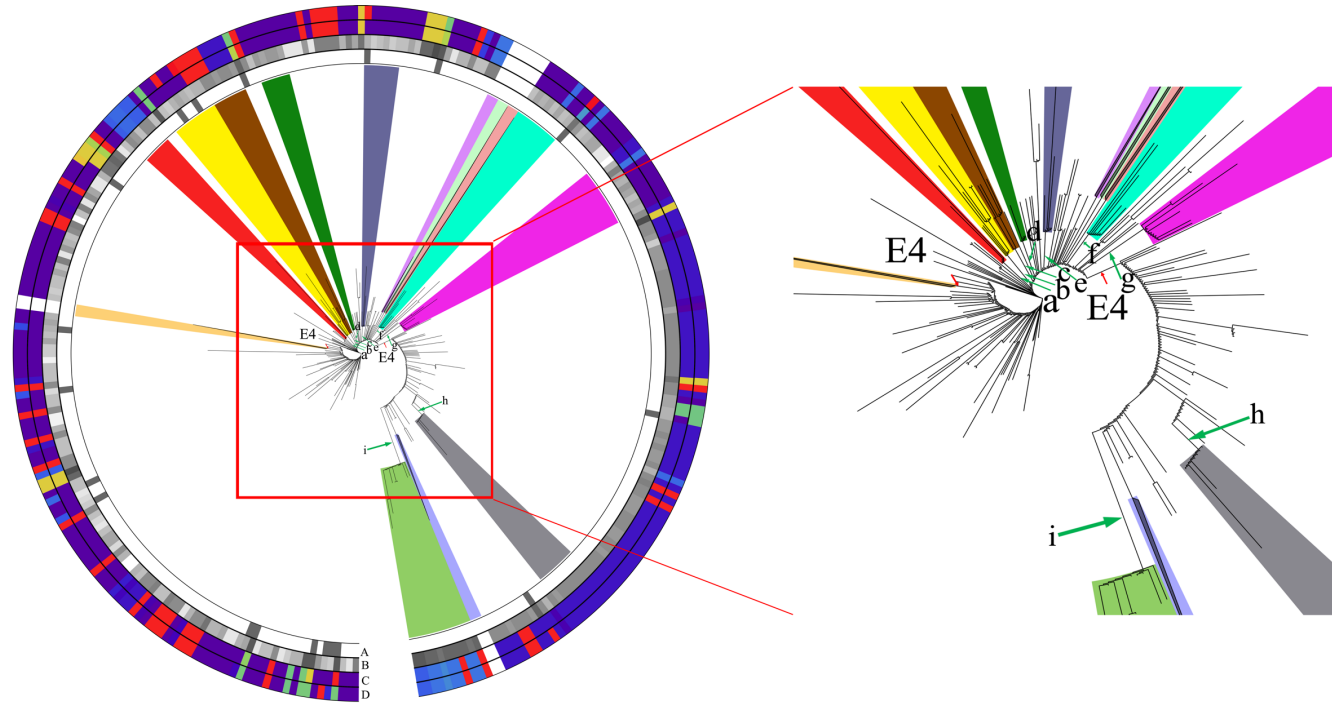

| Event | Minor Clades | Nucleotide substitution | ORF   | Amino Acid Substitution | First Date detected | Location first detected             | Reference: EPI ISL |
|-------|--------------|-------------------------|-------|-------------------------|---------------------|-------------------------------------|--------------------|
| a     | H2           | G27147C                 | M     | p.Asp209His             | 2020/1/25           | Singapore                           | 407987             |
| b     | L2           | C28854T                 | N     | p.Ser194Leu             | 2020/1/16           | China, Shenzhen                     | 406594             |
| c     | G11410A      | G11410A                 | ORF1a |                         | 2020/2/15           | Japan, Diamond Princess cruise ship | 416584             |
| d     | H            | G2293T                  | ORF1a | p.Gln676His             | 2020/2/4            | China, Shanghai                     | 416353             |
| e     | Y            | C21707T                 | S     | p.His49Tyr              | 2020/1/17           | China, Zhuhai                       | 403936             |
| f     | C17373T      | C17373T                 | ORF1b |                         | 2020/1/22           | China, Foshan                       | 406536             |
| g     | S2           | C15324T                 | ORF1b |                         | 2020/1/22           | China, Guangzhou                    | 406533             |
|       |              | C29303T                 | N     | p.Pro344Ser             |                     |                                     |                    |
| h     | I2           | C18656T                 | ORF1b | p.Thr6136Ile            | 2020/2/15           | Japan, Diamond Princess cruise ship | 416565             |
| i     | K            | C6312A                  | ORF1a | p.Thr2016Lys            | 2020/3/5            | Australia, Sydney                   | 417388             |
|       |              | C13730T                 | ORF1b | p.Ala4494Val            |                     |                                     |                    |
|       |              | C23929T                 | S     |                         |                     |                                     |                    |
|       |              | C28311T                 | N     | p.Pro13Leu              |                     |                                     |                    |

479 **Supplementary Figure 2: Minor clades SARS-CoV-2 .** For illustration purposes, the major clades have been collapsed and the central  
480 part of the figure has been enlarged. Most of the genomes that cannot be assigned to any major clade are derived from Asian countries  
481 indicative of high genetic diversity in the relatively early stages of the local epidemics and that a founder effect likely explains the  
482 observations of single predominant clades in North America and Europe which exhibit a reduction in genetic diversity. These genomes  
483 obtained were further analysed and assigned to minor clades. A minor clade was defined with  $n \geq 5$  cases of SARS-CoV-2 based on  
484 phylogenetic and SNP analysis and the events associated with them are indicated by the green arrow. The information contained in the  
485 concentric circles: A, the imported cases; B, the collection date of each genome at one-week resolution; C, collection locations of the  
486 genomes; D exposure locations of the genomes.  
487

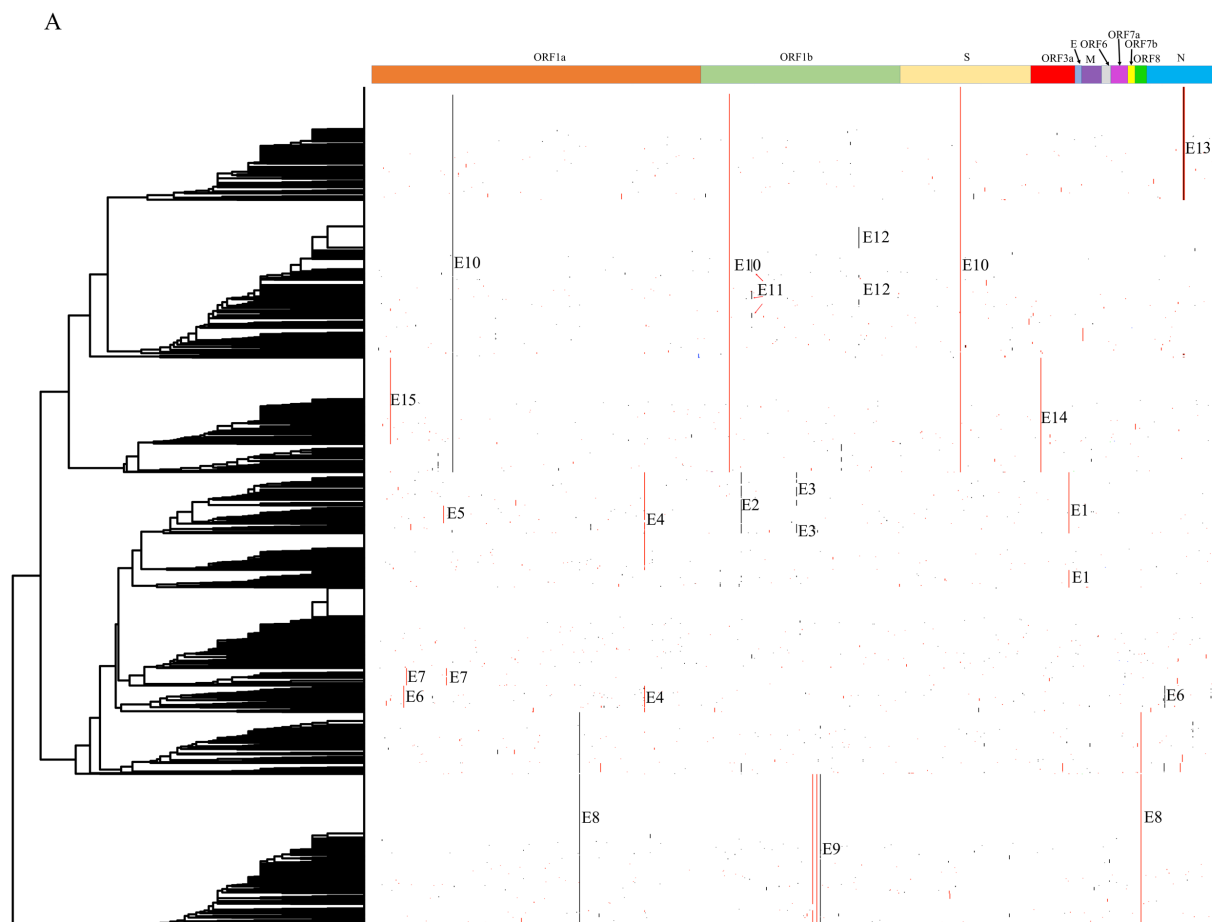

B

| Event | Date first detected | Location first detected         | Reference: EPI_ISL |
|-------|---------------------|---------------------------------|--------------------|
| E1    | 22-Jan-20           | USA, CA                         | 406036             |
| E2    | 25-Jan-20           | China, Hangzhou                 | 415709             |
| E3    | 26-Feb-20           | UK, England                     | 414011             |
| E4    | 17-Jan-20           | China, Yunnan                   | 408480             |
| E5    | 28-Feb-20           | UK, England                     | 414006             |
| E6    | 18-Jan-20           | China, Wuhan                    | 412981             |
| E7    | 25-Feb-20           | Germany, North Rhine-Westphalia | 414497             |
| E8    | 5-Jan-20            | China, Wuhan                    | 406801             |
| E9    | 20-Feb-20           | USA, WA                         | 413456             |
| E10   | 28-Jan-20           | Germany, Munich                 | 406862             |
| E11   | 22-Jan-20           | France, Auvergne-Rhône-Alpes    | 417333             |
| E12   | 27-Feb-20           | Switzerland, Geneva             | 414019             |
| E13   | 25-Feb-20           | Germany, Baden Wuerttemberg     | 412912             |
| E14   | 21-Feb-20           | France, Hauts de France         | 418218             |
| E15   | 21-Feb-20           | France, Hauts de France         | 418218             |

488

489

490 **Supplementary Figure 3. The genomic position and details of SNPs in 2,058 SARS-**

491 **CoV-2 genomes and the amino acid substitution events. (A) Nonsynonymous**

492 **mutations are marked in red, and synonymous mutations are labeled in black. (B) The**

493 **first appearance and the location of each event**

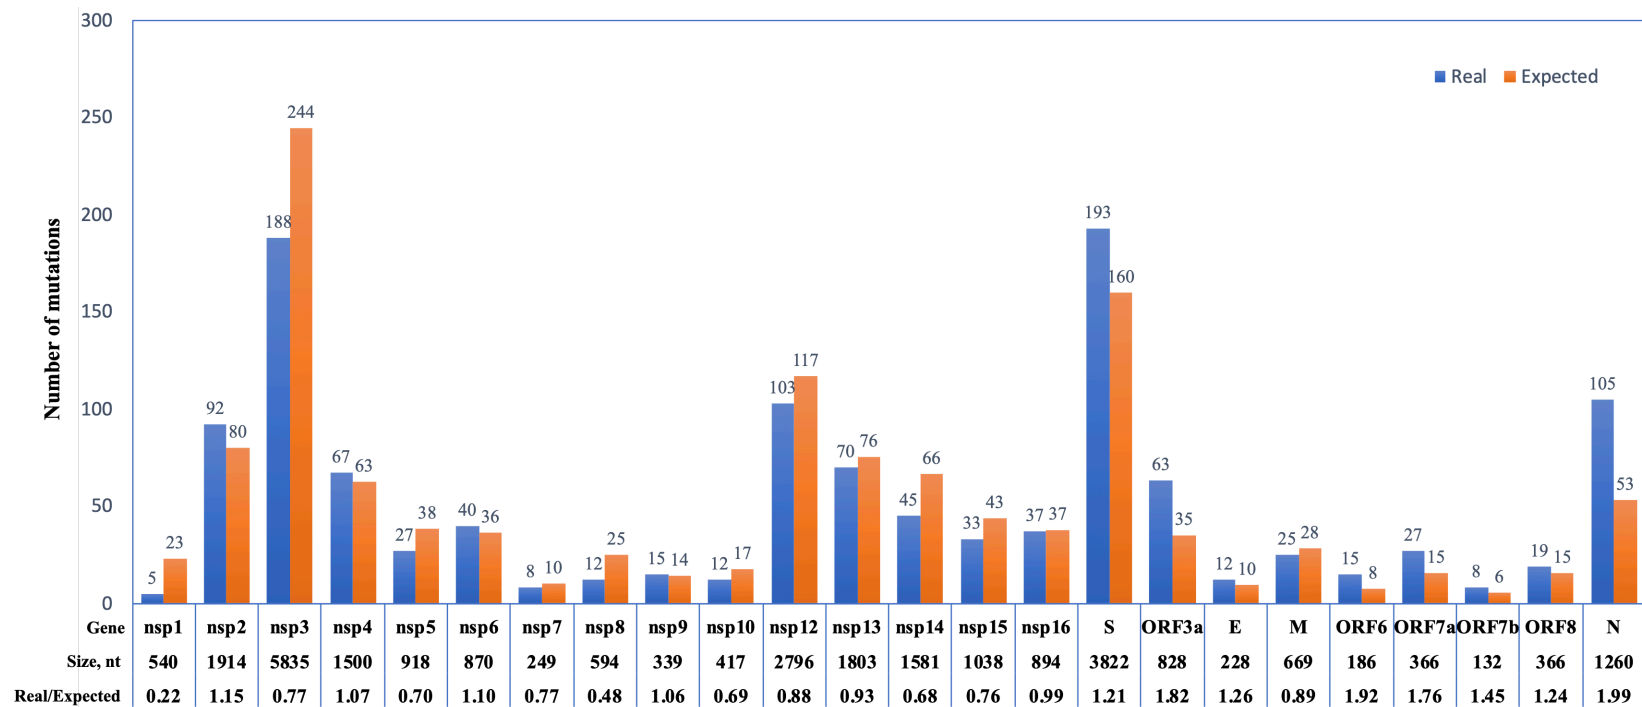

495

496

497

498

499

500

**Supplementary Figure 4.** Number of unique mutations in the genome of SARS-CoV-2. The number of mutations (blue) were taken from 2,058 available genomes from GISAID (March 31<sup>st</sup> 2020). The number of expected mutations (orange) were calculated based on the assumption that there are no purifying or selection pressures present against different categories of point mutations, and all of the mutations occurring randomly according to the size of each gene.

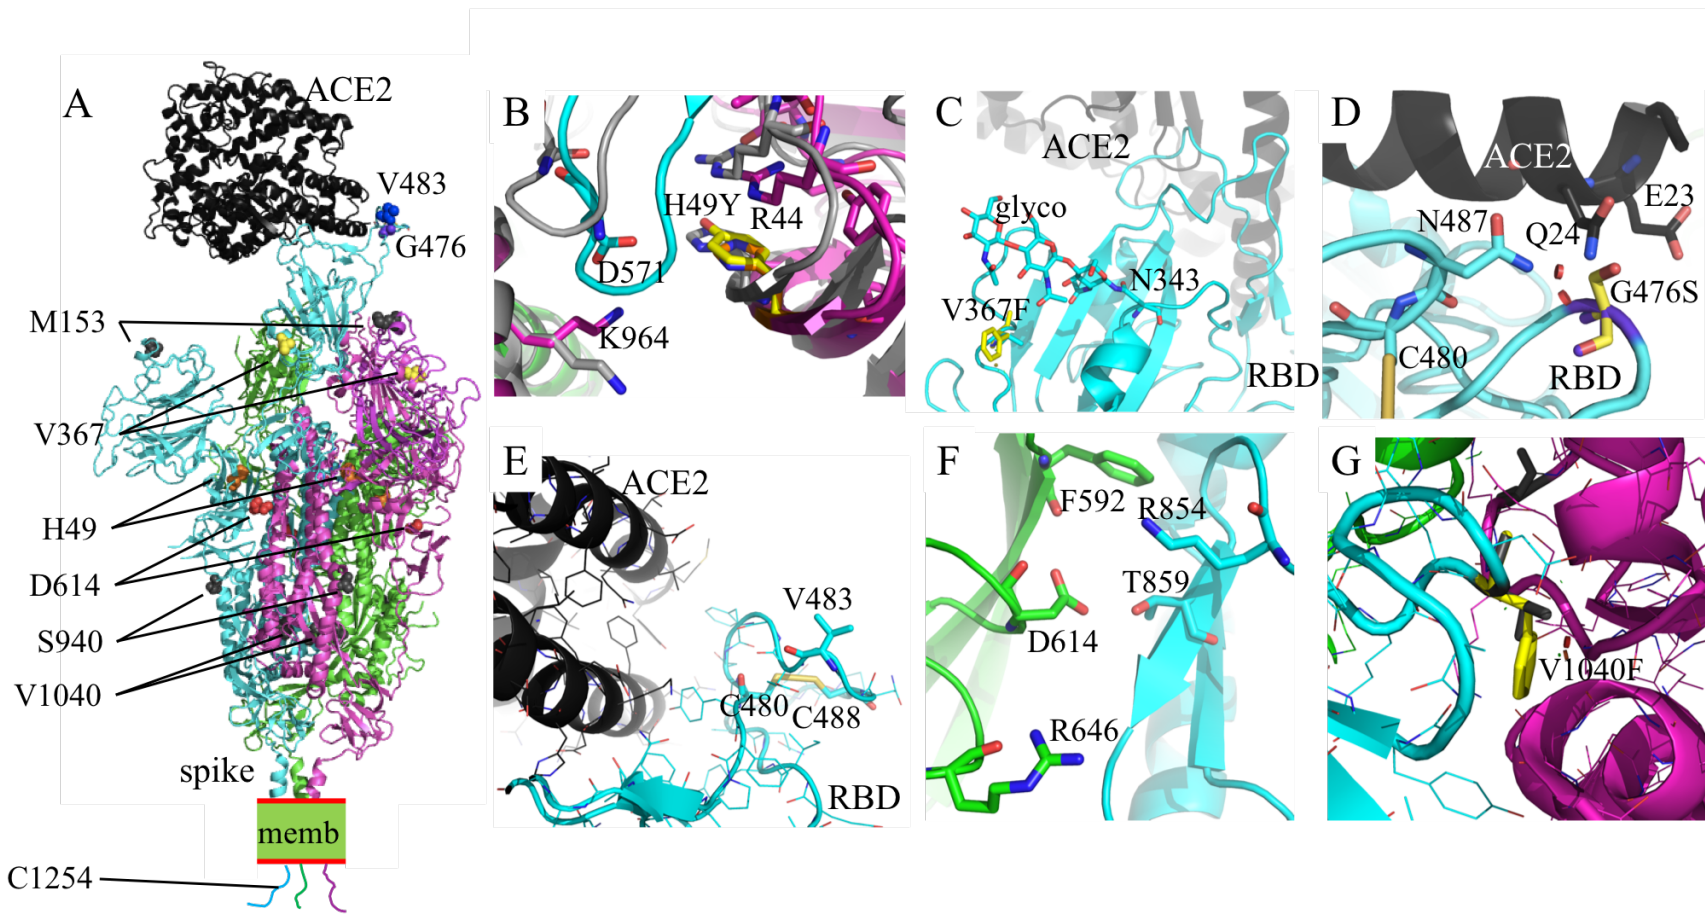

504 modeled based on PDB accessions 6m17 and 6vyb. Identified nonsynonymous mutations are shown as sphere models. For reasons of  
505 visibility only mutations of two of the three S chains are labeled. Memb indicates the membrane. The cytoplasmic tails are depicted in  
506 the same colours as the three spike chains. B-E) Magnified regions of the mutations. (B) H49Y: H49 is located in the N-terminal domain  
507 (NTD) which is in contact with the sub-domain 2 (SD2) of a symmetry-related molecule. The relative position of NTD and SD2 changes  
508 considerably upon going from the closed (grey coloured) to the open state (cyan and magenta). H49 stabilises the rim of the NTD  
509 through cation- $\pi$ -stacking with R44. A tyrosine in position 49 would be able to perform the same role and does not lead to clashes.  
510 However, the substitution may slightly alter the stability of this interaction and the interaction between the NTD and SD2, which, in  
511 turn, might have subtle effects on the stability and equilibrium of open and closed conformations of S. (C) V367F: V367 is part of the  
512 receptor binding domain (RBD), however located too far away from the ACE2-binding site to directly affect receptor binding. V367 is  
513 surface exposed, and its substitution would not create clashes with other protein regions. However, the exchange of a small with a bulky  
514 hydrophobic residue would alter the surface characteristics of this region, which might influence the efficiency of glycosylation (stick  
515 model) of the nearby N343, or the positioning of the sugars. Additionally, the altered RBD surface could potentially interfere with  
516 antibody recognition. (D) G476S: G476 is located in the RBD. It is positioned solvent-exposed in a SARS-CoV-2-specific loop. This  
517 loop is stabilised by a disulphate bridge (C480:C488; C480 is shown as stick model). In the open, ACE2-bound conformation of the  
518 RBD, G476 is close to ACE2 Q24 and E23. The substitution G476S would lead to light clashes with these ACE2 residues (indicated as  
519 red spheres) and with the RBD residues N487. However, minor reorientation of the side chains might allow an additional hydrogen bond  
520 to be formed between S476 and ACE2 Q24 and E23, thus enhancing the affinity. (E) V483A: V483 is also located in the RBD, solvent-  
521 exposed in the same SARS-CoV-2-specific loop as G476 (C480:C488 are shown as stick models). In the open, ACE2-bound  
522 conformation of the RBD, V483 is more than 10Å away from the ACE2 receptor, and hence does not contribute to direct binding or  
523 stability. In the closed conformation, this loop is not modeled in the EM structures (PDB 6vyb), inferring it is flexible in the absence of

524 ACE2. Superimposition of the ACE2-bound conformation of the RBD onto RBDs in a closed conformation shows that this loop region  
525 would stick out into the solvent. Substitution of V483 is consequently not predicted to have a strong impact on receptor binding or  
526 protein stability. By lowering the hydrophobic surface, this substitution might however reduce the non-specific stickiness of this loop  
527 region, and/or affect binding of antibodies. (F) D614G: D614 is located in the SD1. In the trimeric S, D612 engages stabilising  
528 interactions within the SD1 (R646 or the backbone of F592, depending on the chain) and with the S1 of the adjacent chain (T859 and  
529 K854). Replacement of D614 with a glycine would entail losing these stabilising interactions and increase the dynamics in this region.  
530 (G) V1040F: V1040 is located in a loop region that makes hydrophobic contacts between stalk regions of the spike trimer. The V1040F  
531 substitution is possible without steric hindrance, and would slightly increase the hydrophobic contacts between the chains. The other  
532 mutations are not shown in detail, but are evaluated as follows. M153T: M153 is located in the NTD in a solvent-exposed loop. N  
533 electron density was modeled for this loop in the cryo-EM structure (6vyb) suggesting it is flexible. The substitution is expected to be  
534 neutral. S940F: S940 is located in the stalk region, in a solvent-exposed turn. Introducing the bulkier phenylalanine in this position  
535 would not destabilise the structure but locally change the surface characteristics. C1254F: C1254 is the last cysteine in a cysteine-rich  
536 unstructured short cytoplasmic region. This region is required for efficient membrane fusion. The exact mechanism remains to be  
537 elucidated, and hence we cannot assess the exact impact of the C1254F mutation.



538

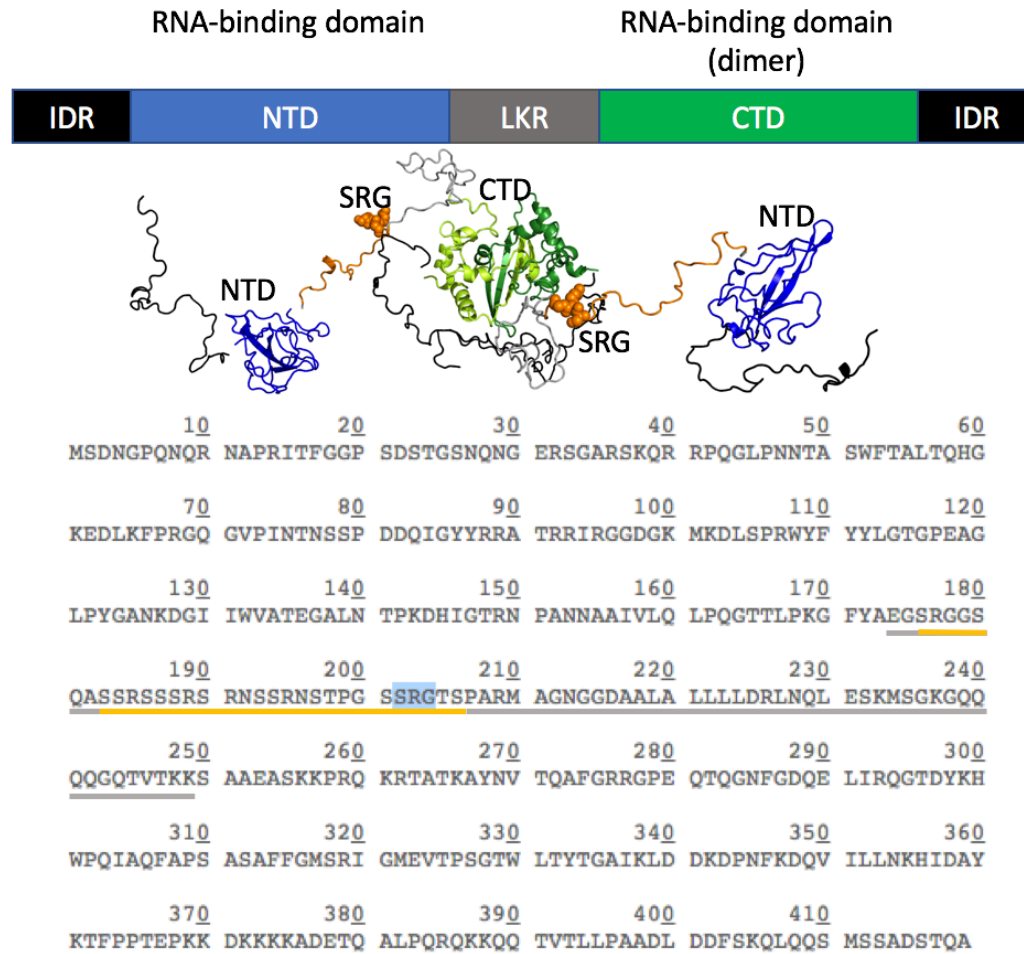

539

540 **Supplementary Figure 6. Mutations in the SARS-CoV-2 nucleocapsid.** The SARS-  
541 CoV-2 nucleoprotein (N) compacts the viral genome into a helical ribonucleocapsid and  
542 hence has key roles in viral assembly<sup>1</sup>. N contains two folded domains, the N-terminal and  
543 the dimeric C-terminal domain (NTD; blue, and CTD; green, respectively). Both domains  
544 are flanked by flexible regions, namely a flexible linker between them (LKR, underlined  
545 in the bottom panel sequence) and ~40 residue intrinsically disordered regions (IDRs) as  
546 tails. The NTD and CTD are RNA-binding regions, but the LKR and IDRs also affect  
547 RNA-binding of N<sup>2</sup>. The LKR contains a serine-arginine (SR)-rich region, which  
548 contributes to RNA binding and N oligomerization. The arginines may promote RNA-  
549 binding through electrostatic interactions, whereas the serines are putative phosphorylation  
550 sites that would counteract RNA binding and possibly favour oligomerisation upon  
551 phosphorylation<sup>3</sup>. The hotspot mutations S202N, R203K and G204R are all within the SR  
552 region of the LKR. S202N would delete a putative phosphorylation site. Given the large  
553 number of alternative serine phosphorylation sites, and the presence of many asparagines  
554 within the linker, this S/N substitution might not have a very strong influence. The  
555 homologous substitution R203K is also expected to have only minor effects. G204R might  
556 increase binding to RNA, and/or affect other homo- or heterologous interactions. In  
557 summary, the substitutions might potentially enhance RNA binding and alter the response  
558 to serine phosphorylation events. The structural figure consists of homology models for  
559 the NTD and CTD, linked by arbitrary but stereochemically-plausible linker regions.

560

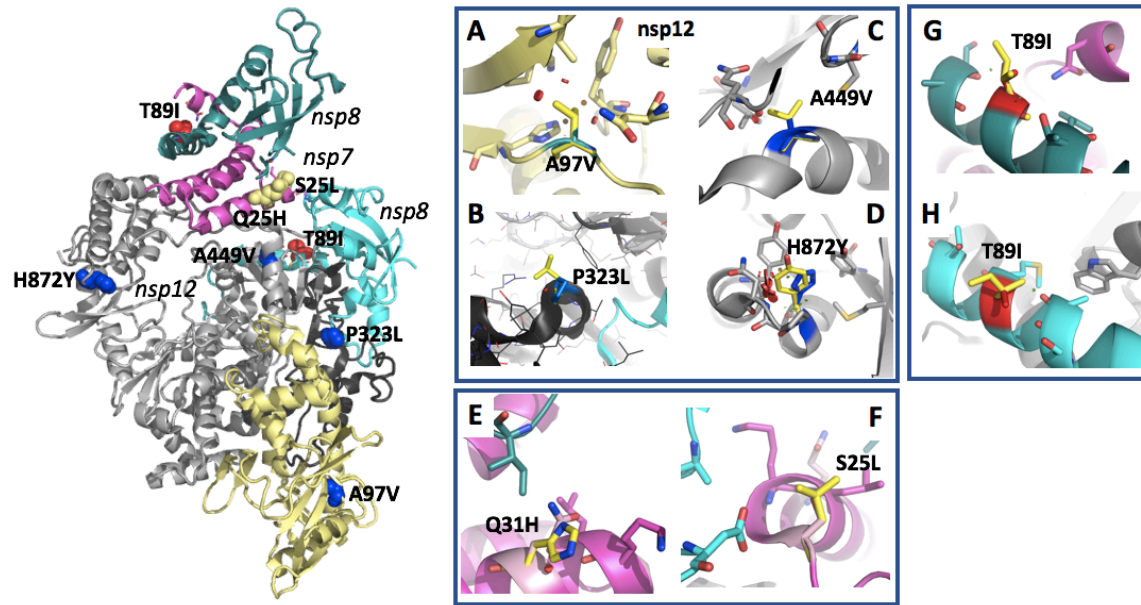

561

562 **Supplementary Figure 7. Mutations in SARS-CoV-2 ORF1ab, nsp12:** The nsp12 RNA-dependent RNA polymerase forms a complex  
563 with one nsp7 and two nsp8, which markedly enhances its polymerase activity<sup>4</sup>. The shown SARS-CoV-2 nsp12 structure is composed  
564 of a nidovirus-unique N-terminal extension (pale yellow), a linker domain (black) and the RNA-dependent RNA polymerase (RdRp)  
565 domain (grey). The structure shows the nsp12 in complex with nsp7 (magenta) and nsp8 (cyan and teal), based on PDB 7btf. (A) A4494  
566 (A97 in nsp12 numbering; shown as a blue sphere models) is located in the N-terminal extension of the polymerase<sup>5,6</sup>. A4494 is sealing  
567 the hydrophobic core of the N-terminal lobe, and its side chain is not solvent exposed. Its replacement with the hydrophobic but slightly  
568 bigger valine (yellow) only leads to minor clashes (small red discs) that would not have a significant impact on the function or stability.  
569 (B) P4720 (P323 in nsp12 numbering) is located in the ‘interface domain’ (black). In this position, the P323L substitution (yellow) is

570 not predicted to disrupt the folding or protein interactions and hence is not expected to have strong effects. (C) A4846V (residue A449  
571 in nsp12 numbering; blue) is located in the finger domain, with its side chain pointing inwards, contributing to a hydrophobic interaction  
572 with the adjacent beta strand. The substitution of A4846 by a valine (yellow) is tolerated in this context. Leading only to minor clashes,  
573 it might slightly improve the stability of this region. (D) H5269 (H872 in nsp12 numbering; blue) is located in the thumb domain. It is  
574 at the tip of a solvent exposed turn, where its replacement by a tyrosine (yellow) would be tolerated without functional impact.

575 **Nsp7:** S2884 and Q3890 (S25 and Q31 in nsp7 numbering; both in light yellow) are solvent exposed on a helix that makes contact with  
576 both nsp8 and nsp12. (E) S25 is capping the N-terminal end of this helix. Its substitution with a leucine (yellow) does not cause steric  
577 problems, but would lead to loss of the capping hydrogen bond. However, D163 from one of the nsp8 molecules also performs a capping  
578 function in the complex, and hence S25L would only have a slightly destabilising effect. (F) Q31 is located on the surface of the helix.  
579 Although Q31 is close to nsp8, its substitution with a histidine (yellow) would not influence this interaction measurably.

580 **Nsp8:** Only T4031 (T89I in nsp8 numbering; red) is included in the structural model. In both nsp8 molecules, T89 is located solvent  
581 exposed on a helix. In neither of the two nsp8 molecules would the substitution T89I create steric problem or affect the interaction with  
582 nsp12 or nsp7.

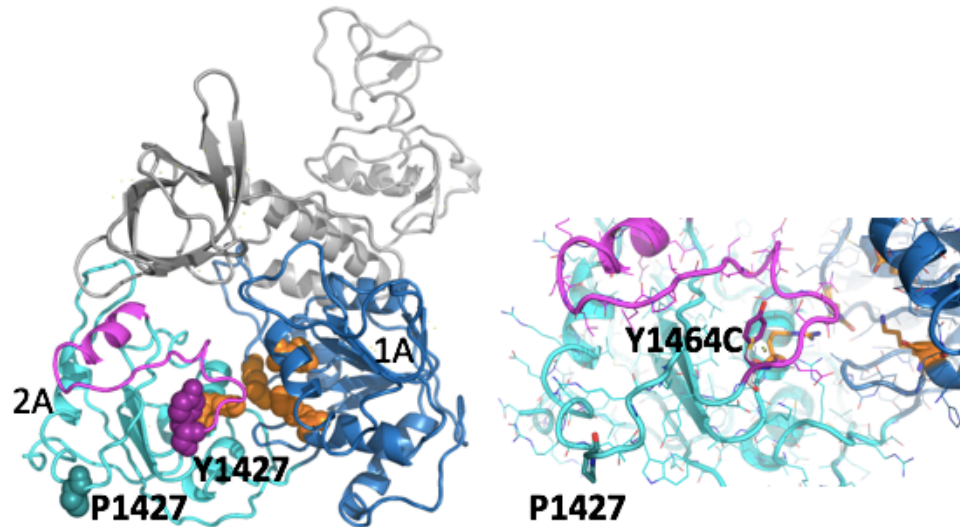

Nsp13, helicase

583

584 **Supplementary Figure 8. Mutations in SARS-CoV-2 ORF1ab, nsp13:** P1427L and Y1464C are both in the helicase nsp13, which  
 585 catalyses the unwinding of duplex oligonucleotides into single strands. Both residues are located on the same side of the 2A domain of  
 586 the helicase. The 2A and adjacent 1A domains coordinate together to complete the final unwinding process. The helicase has been  
 587 modelled based on the 99.8% identical SARS nsp13 (PDB id 6jyt). The domains 1A and 2A are coloured in blue and cyan, respectively.  
 588 The residues involved in NTP binding are shown in orange. Residues on domain 2A that are involved in RNA binding are shown in  
 589 magenta. The other domains are grey. *Left:* overview of the complete structure. Key residues are shown as sphere models. *Right:* zoom  
 590 into the mutated area. Key residues are shown as stick models. For Y1464 the *in silico* mutated cysteine is shown in white. P1427 is

591 located in a solvent-exposed loop region that has not yet reported to be involved in nucleotide binding. Its substitution with a leucine is  
592 not expected to create noticeable effects. Y1464 is part of a region that contributes to binding and unwinding of duplex oligonucleotides<sup>7</sup>.  
593 Its substitution by a cysteine would decrease the stability and enhance the dynamics of this particular region, and might affect RNA  
594 binding and processing.

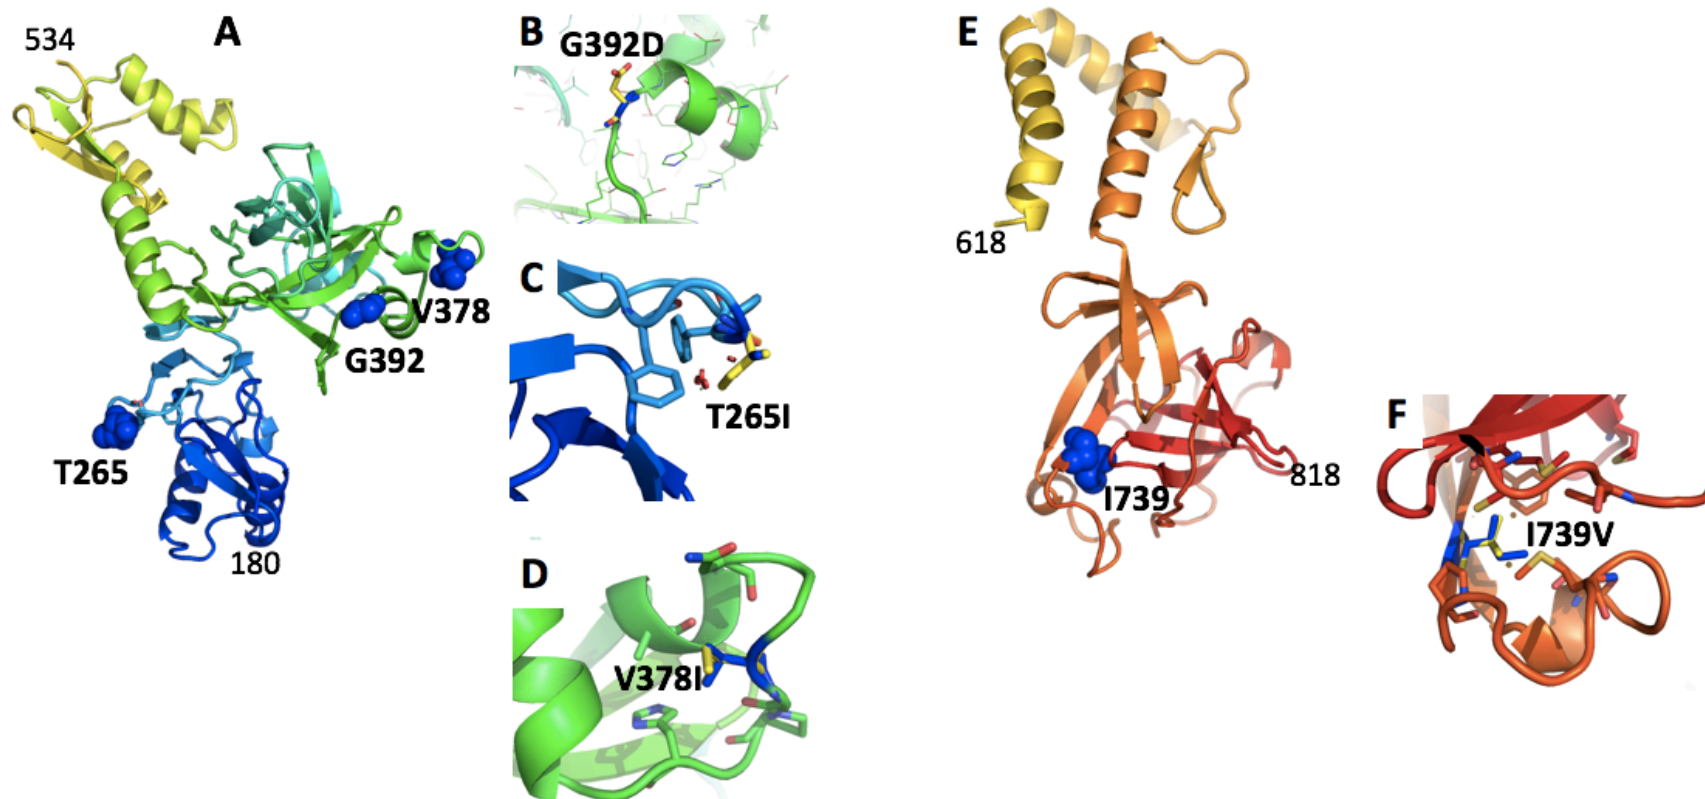

595

596 **Supplementary Figure 9. Mutations in SARS-CoV-2 ORF1a: nsp2.**

597 No experimental structure of sufficiently close homologue is known for nsp2. This structural analysis is therefore based on the proposed  
 598 theoretical AlphaFold model. (A) Shown is a model for residues 180-534, colour ramped from blue to yellow. T265 and G392 are shown  
 599 as blue sphere models. (B) T265 (blue stick model, corresponding to residue T58 in the nsp2 cleavage product numbering) is located at  
 600 the tip of a loop that is pinned to the core of the N-terminal domain (blue) via hydrophobic residues (two phenylalanines are shown as

601 stick models). Being exposed to the solvent, the T265I substitution (shown in yellow) is not expected to have significant impact on  
602 protein fold or function. (C) G392 (G212 in nsp2 numbering; shown in blue) is placed in a solvent accessible loop, according to the  
603 AlphaFold model. In this position even the non-conservative substitution with an aspartic acid (yellow) is not predicted to have  
604 significant impact on protein fold or function. (D) V378 is located in a surface exposed loop. Its substitution by an isoleucine will not  
605 create steric clashes, nor lead to loss of hydrophobic interactions. (E) A second nsp2 fragment is shown, colour ramped from yellow to  
606 red, comprising residues 618 to 818. I793 is shown as blue sphere model. (F) I739V (I559 in nsp2 numbering; shown in blue) is part of  
607 a hydrophobic core of a small C-terminal domain. Its substitution with an only slightly smaller hydrophobic valine (yellow) would only  
608 have insignificant destabilising effects on this region.



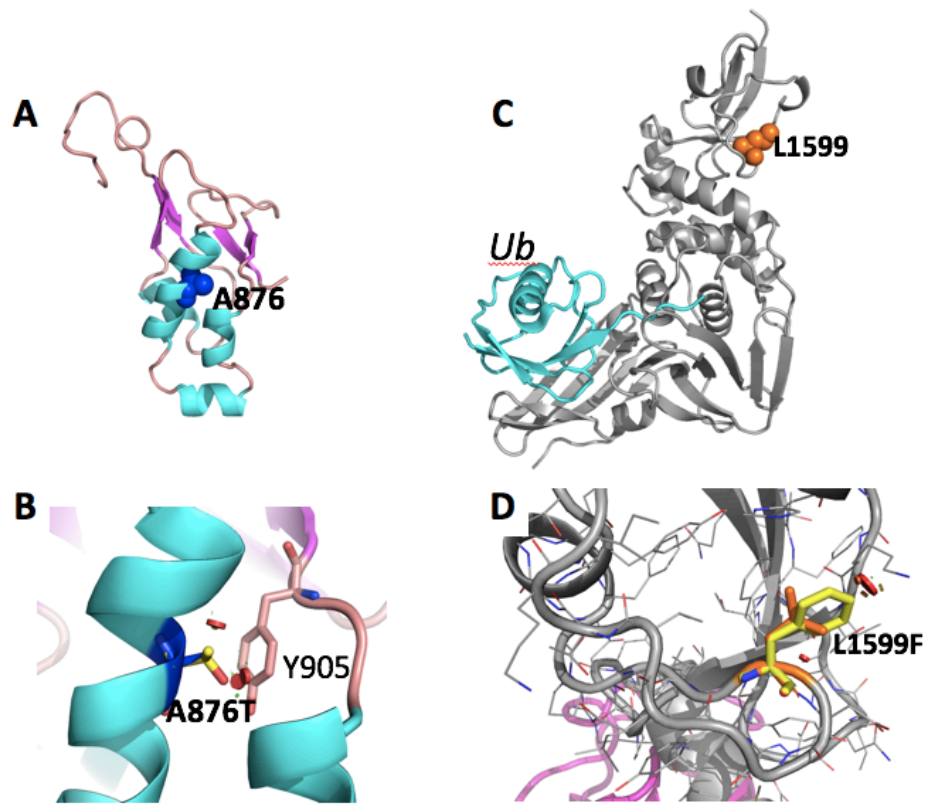

609

610 **Supplementary Figure 10. Mutations in SARS-CoV-2 *ORF1a*: nsp3.** The substitution A876T (corresponding to residue A58 in the  
 611 nsp3 cleavage product numbering) is situated in the N-terminal ubiquitin-like domain of nsp3. (A) The structure of this domain can be  
 612 inferred based on the 79% identical structure of residues 1-112 from SARS-CoV (PDB id 2idy). Helices are coloured in cyan, strands  
 613 in magenta and loops in pale orange. A876 is shown as blue sphere model. (B) Zoom onto A876. A876 (blue stick model) is placed  
 614 within a helix, engaging hydrophobic contacts with Y905 (stick model). The substitution into a slightly larger threonine (yellow stick

615 model) can be accommodated with only minor structural adjustments (clashes are shown as red spheres) and hence the A876T mutation  
616 is not expected to have a substantial influence on the proteins stability and function. (C) L1599F is located in the papain-like protease.  
617 The structure (grey) has been modelled based on the ~83% identical SARS-CoV structures in complex with ubiquitin (Ub, cyan, based  
618 on 4m0w). L1599 is remote from the active site in the Ubl domain. (D) Its substitution does not lead to clashes and is expected to be  
619 neutral in terms of function and protein stability. No templates have been identified for V378I.

620

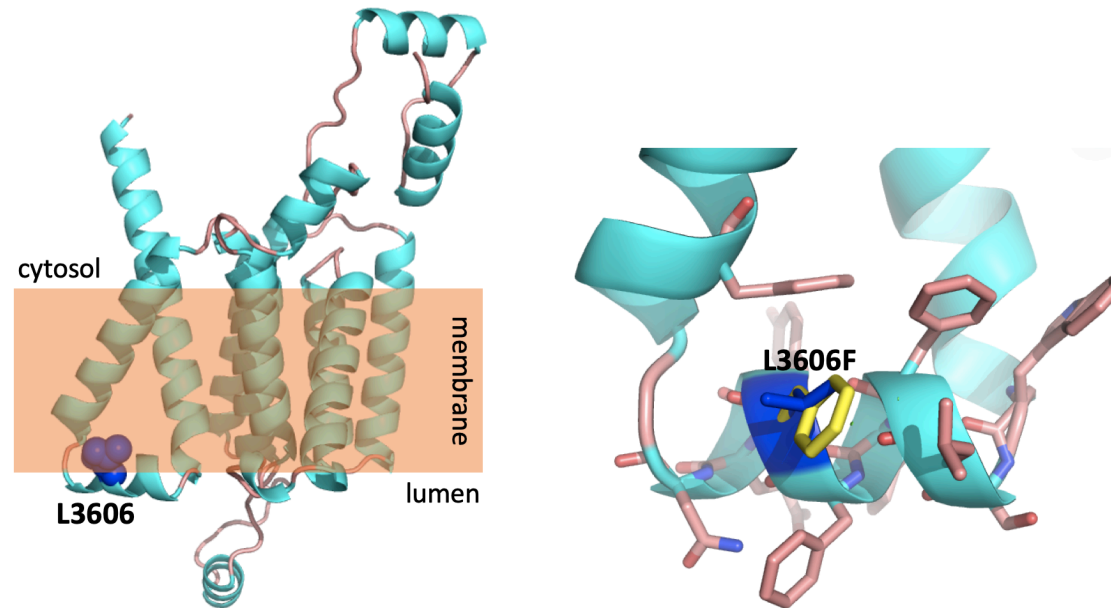

621

622 **Supplementary Figure 11. Mutations in SARS-CoV-2 ORF1a: nsp6.** L3606 (corresponding to residue L37 in the nsp6 cleavage  
623 product) is a multi-pass transmembrane protein for which no experimental structure of sufficiently close homologue is known. This  
624 structural analysis is therefore based on the proposed theoretical AlphaFold model (*Left*). Helices are colored in cyan, loops in pale  
625 orange. L3606 is shown as blue sphere model. The endoplasmic reticulum membrane is shown in orange; lumen and cytoplasmic sides  
626 are indicated. *Right*: close-up view of the location of L3606 (shown as blue stick model). L3606 is located in a predicted helical region  
627 that is partly submerged in the membrane, lying parallel to its luminal surface. According to the structural model, L3606 is exposed to  
628 the membrane, and hence its substitution with a larger but still hydrophobic phenylalanine would not impact structure or function.

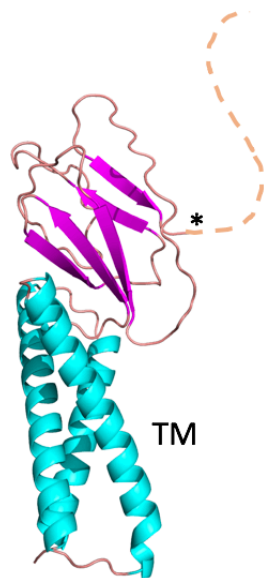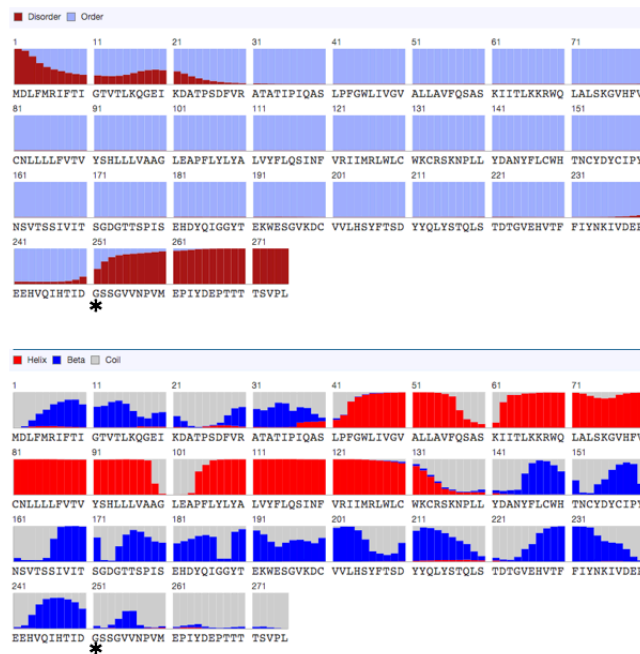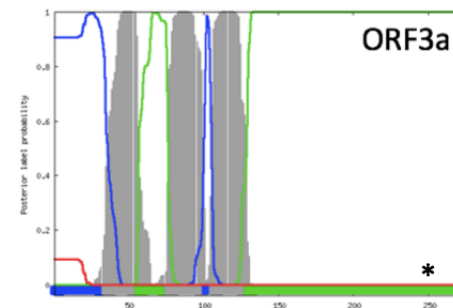

629  
 630 **Supplementary Figure 12. Mutations in SARS-CoV-2 ORF3a.** ORF3a is a viroporin that forms a pentameric potassium-sensitive ion  
 631 channel. ORF3a activates the inflammasome which facilitates viral release and aggravates disease symptoms<sup>8</sup>. ORF3a contains a 3-pass  
 632  $\alpha$ -helical TM region (cyan in left panel, and greyed regions in TM prediction, right panel) and a domain predicted to have a  $\beta$ -sandwich  
 633 fold (magenta; see also middle panel and right panel). The ORF3a N- and C-terminal tails are predicted to be disordered (middle panel,  
 634 top). A theoretical model for the Orf3a monomer has been proposed by AlphaFold<sup>9</sup>. The structure-function relationship of this protein  
 635 remains to be clarified. The mutation G251V is located C-terminal to the  $\beta$ -sandwich domain and the tail (marked by an asterisk). In  
 636 this position, the substitution is not expected to affect the protein fold or function significantly.

637

638

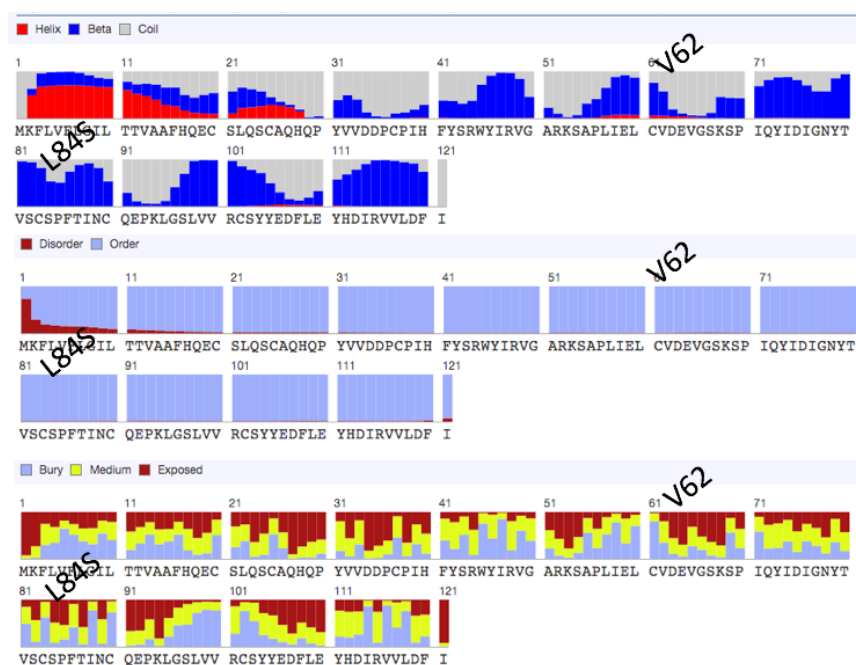

639

640

641 **Supplementary Figure 13. Mutations in SARS-CoV-2 ORF8.** ORF8 has an N-terminal  
642 *sec*-pathway signal peptide with a cleavage site after residue 15, suggesting that it is  
643 secreted into the extracellular space. Following signal peptide cleavage, the ORF8 protein  
644 core is predicted to consist largely of  $\beta$ -strands and features seven cysteines (top panel).  
645 We predict that this protein adopts a cysteine disulfide-bond stabilised  $\beta$ -sandwich  
646 structure inferring that ORF8 also functions as a ligand binding module. Homology  
647 modeling or *ab initio* servers failed to produce a model consistent with the proteins'  
648 secondary structure predictions. V62 and L84 are predicted to be partially solvent-exposed  
649 (bottom), and located at the end (V62) or in the middle (L84) of secondary structural  
650 elements (depending on the prediction server, the region surrounding V62 is predicted as  
651 strand or helix; L84 is in a  $\beta$  strand). Hence, we can only speculate that the mutations V62L  
652 and L84S might have little effect on the stability of the disulphate-stabilised fold, but might  
653 have minor (or no) effects on ligand binding.

654 **SUPPLEMENTARY TABLES**

655 **Supplementary Table 2.** Experimentally validated amino acid substitutions resulting in escape mutants or having functional

656 significance in N and S proteins of SARS-CoV and MERS-CoV.

657

| Protein | Residue | Virus    | Substitution in SARS-CoV-2 | GISAID (EPI_ISL)                                                                                       | Functional role of the residue                                              | Reference |
|---------|---------|----------|----------------------------|--------------------------------------------------------------------------------------------------------|-----------------------------------------------------------------------------|-----------|
| N       | T149    | SARS-CoV | T148I                      | 406595                                                                                                 | T149 is an epitope that interacts with neutralising antibody.               | 10        |
|         | K250    | SARS-CoV | K249I                      | 408515                                                                                                 | K250 is an essential motif for binding SN5-25 antibody.                     | 10        |
|         | S328    | SARS-CoV | S327L                      | 413557                                                                                                 | S328 forms inter-dimer disulfide bonds connecting the two $\beta$ -strands. | 11        |
| S       | R395    | SARS-CoV | R408I                      | 413522                                                                                                 | R395 interacts with one of the most potent neutralising antibody m396.      | 12        |
|         | D463    | SARS-CoV | G476S                      | 417085, 417380, 418055, 418077, 417353, 41708, 416447                                                  | D463G is associated with neutralisation escape from MAbs S224.1.            | 13        |
|         | I529    | MERS-CoV | V483A                      | 414618, 415596, 415605, 417072, 417073, 417075, 417076, 417111, 417139, 417159, 417160, 418029, 418071 | I529T reduces affinity of RBD to the DPP4/CD26 receptor.                    | 14        |

658 **SUPPLEMENTARY REFERENCES:**

- 659 1. Chang, C. K., Hou, M. H., Chang, C. F., Hsiao, C. D. & Huang, T. H. The SARS coronavirus nucleocapsid protein - Forms and  
660 functions. *Antiviral Research* (2014). doi:10.1016/j.antiviral.2013.12.009
- 661 2. Chang, C.-K. *et al.* Multiple Nucleic Acid Binding Sites and Intrinsic Disorder of Severe Acute Respiratory Syndrome  
662 Coronavirus Nucleocapsid Protein: Implications for Ribonucleocapsid Protein Packaging. *J. Virol.* (2009).  
663 doi:10.1128/jvi.02001-08
- 664 3. Peng, T. Y., Lee, K. R. & Tarn, W. Y. Phosphorylation of the arginine/serine dipeptide-rich motif of the severe acute  
665 respiratory syndrome coronavirus nucleocapsid protein modulates its multimerization, translation inhibitory activity and  
666 cellular localization. *FEBS J.* **275**, 4152–4163 (2008).
- 667 4. Subissi, L. *et al.* One severe acute respiratory syndrome coronavirus protein complex integrates processive RNA polymerase  
668 and exonuclease activities. *Proc. Natl. Acad. Sci. U. S. A.* (2014). doi:10.1073/pnas.1323705111
- 669 5. Gao, Y. *et al.* Structure of the RNA-dependent RNA polymerase from COVID-19 virus. *Science* **7498**, 1–9 (2020).
- 670 6. Kirchdoerfer, R. N. & Ward, A. B. Structure of the SARS-CoV nsp12 polymerase bound to nsp7 and nsp8 co-factors. *Nat.*  
671 *Commun.* (2019). doi:10.1038/s41467-019-10280-3
- 672 7. Jia, Z. *et al.* Delicate structural coordination of the Severe Acute Respiratory Syndrome coronavirus Nsp13 upon ATP  
673 hydrolysis. *Nucleic Acids Res.* (2019). doi:10.1093/nar/gkz409
- 674 8. Siu, K. L. *et al.* Severe acute respiratory syndrome Coronavirus ORF3a protein activates the NLRP3 inflammasome by  
675 promoting TRAF3-dependent ubiquitination of ASC. *FASEB J.* (2019). doi:10.1096/fj.201802418R

- 676 9. John Jumper, Tunyasuvunakool, K., Kohli, P. & Hassabis, D. Computational predictions of protein structures associated with  
677 COVID-19. (2020). Available at: [https://deepmind.com/research/open-source/computational-predictions-of-protein-structures-](https://deepmind.com/research/open-source/computational-predictions-of-protein-structures-associated-with-COVID-19)  
678 [associated-with-COVID-19](https://deepmind.com/research/open-source/computational-predictions-of-protein-structures-associated-with-COVID-19).
- 679 10. Lin, Y. *et al.* Identification of an epitope of SARS-coronavirus nucleocapsid protein. *Cell Res.* (2003).  
680 doi:10.1038/sj.cr.7290158
- 681 11. Chang, C. ke, Chen, C. M. M., Chiang, M. hui, Hsu, Y. lan & Huang, T. huang. Transient Oligomerization of the SARS-CoV N  
682 Protein - Implication for Virus Ribonucleoprotein Packaging. *PLoS One* (2013). doi:10.1371/journal.pone.0065045
- 683 12. Tian, X. *et al.* Potent binding of 2019 novel coronavirus spike protein by a SARS coronavirus-specific human monoclonal  
684 antibody. *Emerging Microbes and Infections* (2020). doi:10.1080/22221751.2020.1729069
- 685 13. Rockx, B. *et al.* Escape from Human Monoclonal Antibody Neutralization Affects In Vitro and In Vivo Fitness of Severe Acute  
686 Respiratory Syndrome Coronavirus. *J. Infect. Dis.* (2010). doi:10.1086/651022
- 687 14. Kim, Y. *et al.* Spread of mutant middle east respiratory syndrome coronavirus with reduced affinity to human CD26 during the  
688 south Korean outbreak. *MBio* (2016). doi:10.1128/mBio.00019-16
- 689
